1 Patterns of mesozooplankton community composition and vertical fluxes in the global  
2 ocean

3

4 Yawouvi Dodji Soviadan<sup>1</sup>, Fabio Benedetti<sup>2</sup>, Manoela C. Brandão<sup>1,3</sup>, Sakina-Dorothee  
5 Ayata<sup>1</sup>, Jean-Olivier Irisson<sup>1</sup>, Jean Louis Jamet<sup>5</sup>, Rainer Kiko<sup>1</sup>, Fabien Lombard<sup>1,4</sup>, Kissao  
6 Gnandi<sup>5</sup>, Lars Stemmann<sup>1,\*</sup>

7

8 1 Sorbonne Université, CNRS, Laboratoire d'Océanographie de Villefranche, 06230  
9 Villefranche-sur-mer, France.

10 2 Environmental Physics, Institute of Biogeochemistry and Pollutant Dynamics, ETH Zürich,  
11 Universitätstrasse 16, 8092 Zürich, Switzerland.

12 3 Institut Français de Recherche pour l'Exploitation de la Mer, Centre Bretagne, 29280  
13 Plouzané, France.

14 4 Institut Universitaire de France (IUF), Paris, France

15 5 Université de Toulon, Mediterranean Institute of Oceanology (MIO), AMU-UTLN UM110,  
16 Equipe EMBIO. CS 60584, 83041 TOULON Cedex 9, FRANCE

17 6 Département de Géologie, Université de Lomé, Togo.

18 .

19

20 Corresponding author\*

21

22

## 23 Abstract

24 Vertical variations in physical and chemical conditions drive changes in marine  
25 zooplankton community diversity and composition. In turn, zooplankton communities play a  
26 critical role in regulating the transfer of organic matter produced in the surface ocean to deeper  
27 layers. Yet, the links between zooplankton community composition and the strength of vertical  
28 fluxes of particles remain elusive, especially on a global scale. Here, we provide a  
29 comprehensive analysis of variations in zooplankton community composition and vertical  
30 particle flux in the upper kilometer of the global ocean. Zooplankton samples were collected  
31 across five depth layers and vertical particle fluxes were assessed using continuous profiles of  
32 the Underwater Vision Profiler (UVP5) at 57 stations covering seven ocean basins.  
33 Zooplankton samples were analysed using a Zooscan and individual organisms were classified  
34 into 19 groups for the quantitative analyses. Zooplankton abundance, biomass and vertical  
35 particle flux decreased from the surface to 1000m depth at all latitudes. The zooplankton  
36 abundance decrease rate was stronger at sites characterised by oxygen minima ( $< 5\mu\text{mol O}_2.\text{kg}^{-1}$ )  
37 where most zooplankton groups showed a marked decline in abundance, except the  
38 jellyfishes, molluscs, annelids, large protists and a few copepod families. The attenuation rate  
39 of vertical particle fluxes was weaker at such oxygen-depleted sites. Canonical redundancy  
40 analyses showed that the epipelagic zooplankton community composition depended on the  
41 community structure of surface phytoplankton and the quantity and the quality of the produced  
42 particulate organic matter. We provide a consistent baseline of plankton community structure  
43 together with estimates of vertical flux and a contribution to our understanding of global  
44 zooplankton dynamics in the upper kilometer of the global ocean. Our results further suggest  
45 that future changes in surface phytoplankton composition and mesopelagic oxygen loss might  
46 lead to profound changes in zooplankton abundance and community structure in both the  
47 euphotic and mesopelagic ocean. These changes may affect the vertical export and hereby the  
48 strength of the biological carbon pump

49

50

51 **Keywords: Zooplankton, Global Ocean, biological carbon pump, Epipelagic, Mesopelagic, Community**  
52 **structure, Particle flux, Attenuation rates, Oxygen Minimum Zone.**

## 53 Introduction

54 The upper kilometer of the ocean constitutes a habitat where most of the organic carbon  
55 produced by the phytoplankton in the epipelagic layer (0-200m) sinks into the mesopelagic  
56 layer (200-1000m) while being progressively consumed and respired. Within the wide size  
57 spectrum of planktonic organisms (0.02 $\mu$ m-2m), mesozooplankton (0.2-20mm) are a pivotal  
58 component of marine trophic webs impacting the Biological Carbon Pump (BCP) through their  
59 feeding, vertical migration, and the production of faecal pellets (Steinberg and Landry, 2017).  
60 In a context of global climate change, zooplankton communities experience increasingly  
61 stressful conditions through global warming, ocean acidification and deoxygenation (Oschlies  
62 et al., 2018; Schmidtko et al., 2017), enhanced water column stratification in the open ocean  
63 and modifications in phytoplankton production and community structure (Coma et al., 2009;  
64 Kwiatkowski et al., 2019; Richardson, 2008). Long term field surveys have shown how shifts  
65 in climatic conditions lead to large shifts in surface zooplankton composition (Beaugrand et al.,  
66 2019). Future climate warming could further reduce macronutrient supplies in the upper ocean  
67 and therefore decrease phytoplankton biomass in the tropical open ocean or can cause positive  
68 trophic amplification in the polar ocean (Chust et al., 2014). Such changes in biomass may be  
69 amplified in the zooplankton through trophodynamic effects, which could greatly alter the  
70 fluxes of organic matter into the deeper mesopelagic layers. Within the latter, modifications of  
71 the quantity and quality of the vertical particle flux produced in the surface layers could trigger  
72 substantial changes in mesozooplankton abundance and composition. In addition, the expansion  
73 of Oxygen Minimum Zones (OMZ) (Schmidtko et al., 2017; Stramma et al., 2010) may further  
74 constrain the spatial distribution of the numerous zooplankton taxa that are sensitive to  
75 dissolved oxygen levels (Ekau et al., 2010; Kiko et al., 2020; Kiko and Hauss, 2019; Seibel,  
76 2011; Wishner et al., 2020, 2018). Therefore, understanding the variations of zooplankton  
77 biomass and diversity in the epi and mesopelagic is essential to better understand the impact of  
78 global climate change on the properties of marine ecosystems.

79 However, mesopelagic zooplankton communities remain critically under-sampled  
80 compared to the epipelagic ones, as most collections is in the first 200m of the water column  
81 (Everett et al., 2017). The mesopelagic is still considered a “dark hole” (Robinson et al., 2010;  
82 St John et al., 2016) as the gaps in sampling lead to critical gaps in knowledge regarding the  
83 functioning of mesopelagic ecosystems and how they are controlled by the organic matter  
84 fluxing from the euphotic zone. Local to regional field studies reported that the abundance of  
85 mesozooplankton decreases exponentially with depth, in parallel with substantial changes in  
86 species diversity and genus composition that remain poorly resolved (Bode et al., 2018;

87 Brugnano et al., 2012; Hernández-León et al., 2020; Koppelman et al., 2005; Kosobokova and  
88 Hopcroft, 2010; Yamaguchi et al., 2004). Some studies reported increases in diversity with  
89 depth, with maxima in the meso- to bathypelagic layers (Bode et al., 2018; Gaard et al., 2008;  
90 Kosobokova and Hopcroft, 2010; Yamaguchi et al., 2004), whereas other studies reported either  
91 the opposite diversity pattern or even an absence of vertical patterns due to large spatio-  
92 temporal variability (Gaard et al., 2008; Hidalgo et al., 2012; Palomares-García et al., 2013;  
93 Wishner et al., 2008). Such mismatch between observations might be related to the wide range  
94 of environmental conditions sampled using a variety of sampling gears that make inter-  
95 comparisons difficult. One recent global analysis of zooplankton vertical distribution in inter-  
96 tropical regions showed that in this narrow latitudinal band the vertical dimension was the main  
97 structuring pattern suggesting that midwater processes mediated by zooplankton may not  
98 change between oceans at those latitudes (Fernández de Puelles et al., 2019). How these  
99 changes relate to the vertical flux and also across the full latitudinal band is poorly understood  
100 because plankton observations and biogeochemical studies have usually been carried out by  
101 distinct scientific communities. Recent interdisciplinary cruises have taken place, providing  
102 more integrated knowledge on the importance of zooplankton to carbon sequestration (Guidi et  
103 al., 2016; Kiko et al., 2020; Steinberg and Landry, 2017; Stukel et al., 2019). No global study  
104 has yet been able to analyse community-level variations in zooplankton abundances, biomass  
105 and community composition in conjunction with assessments of vertical particle flux in the  
106 upper kilometre of the global ocean.

107 Here, a homogeneous dataset of community-level zooplankton images generated from  
108 the TARA Oceans expeditions is explored together with associated measurements of their  
109 contextual environmental conditions to: (i) test whether zooplankton communities present  
110 consistent vertical variations in abundance and composition across the oceans and in different  
111 latitudinal bands, and (ii) investigate the main drivers of such vertical gradients and how they  
112 are coupled to the surface phytoplankton and estimates of particle flux. The TARA Oceans  
113 expedition collected over 35000 samples encompassing the whole plankton community (i.e.,  
114 from viruses to jellyfish) across the global ocean from 2009 to 2013 (Karsenti et al., 2011).  
115 Previous studies that analysed the TARA Oceans imaging dataset explored the global latitudinal  
116 gradients in richness and composition for the whole plankton community focusing on surface  
117 waters (Ibarbalz et al., 2019; Brandao et al., in press). Here, we aim to describe the community  
118 composition of mesozooplankton down to 1000m depth on a global scale. As the imaging  
119 techniques used here cannot achieve a species-level identification of the zooplankton

120 community composition, our approach is rather oriented towards larger taxonomic and /or  
121 functional groups that may be associated with broad ecological and biogeochemical functions.

## 122 [Materials and methods](#)

### 123 **Sampling sites and environmental variables**

124 TARA Oceans took place between 2009 and 2013. Among the 210 stations that were  
125 sampled, 57 stations covering 7 ocean basins (Fig. 1) were sampled with a Multinet (Pesant et  
126 al., 2015; Roullier et al., 2014), a sampling device with five nets that allows for depth-stratified  
127 sampling (see below).

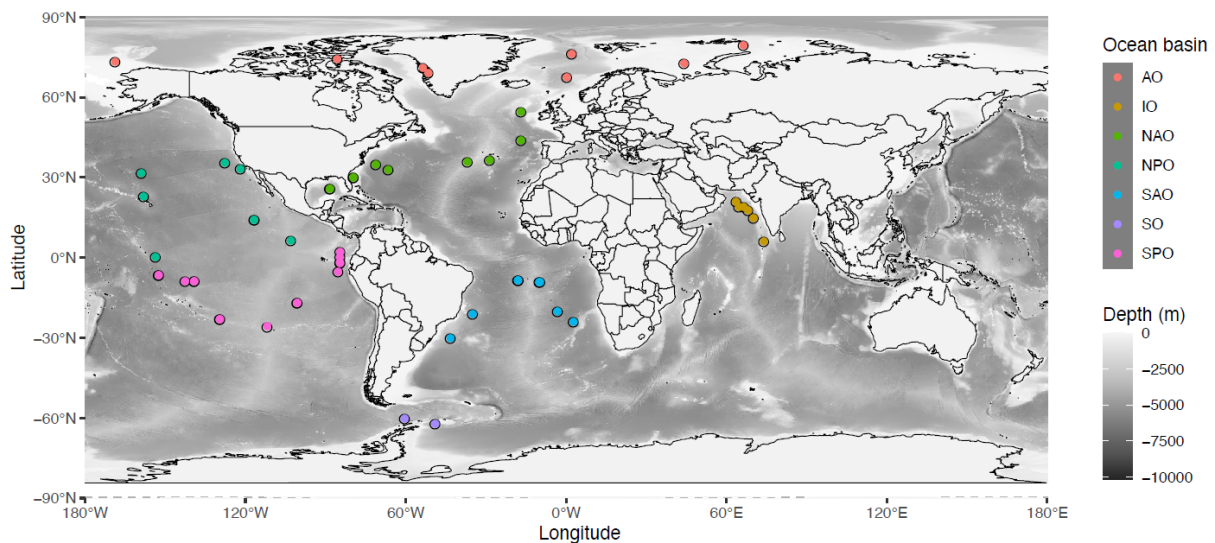

128  
129 **Fig. 1:** Location of the 57 stations sampled with the Multinet, grouped by ocean basin: AO=Arctic  
130 Ocean, IO=Indian Ocean, NAO=North Atlantic Ocean, NPO=North Pacific Ocean, SAO=South  
131 Atlantic Ocean, SO=Southern Ocean or Austral Ocean, SPO=South Pacific Ocean.

132  
133 A CTD rosette equipped with optical sensors was deployed to measure the physico-  
134 chemical parameters within the water column. Temperature and conductivity were measured  
135 from the surface to a maximum of 1300 m depth using a Seabird 911 CTD mounted on a Sea-  
136 Bird Carousel sampler with 10 Niskin bottles. The following additional sensors were mounted  
137 to measure optical properties related to relevant biogeochemical variables: fluorometer (Wetlab  
138 ECO-AFL/FL model), dissolved oxygen sensor (model SBE 43), nitrate sensor (ISUS with a  
139 maximum rating depth of 1000m Satlantic SA), a 25 cm transmissometer for particles 0.5–20  
140  $\mu\text{m}$  (WETLabs), a one-wavelength backscatter meter for particles 0.5–10  $\mu\text{m}$  (WETLabs), and  
141 an Underwater Vision Profiler 5 (UVP5) for particles >150  $\mu\text{m}$  and zooplankton >600  $\mu\text{m}$

142 (Hydroptic). Assuming that particle sinking speed increases with size, those particles detected  
143 through the backscattering will be referred to as suspended particulate matter (SPM, particles  
144  $< 10\mu\text{m}$  in Equivalent Spherical Diameter), while the ones detected by the UVP5 ( $>150\mu\text{m}$  in  
145 Equivalent Spherical Diameter) will be referred as particles. Vertical particle mass flux (in mg  
146 Dry Weight  $\text{m}^{-2}\text{d}^{-1}$ ) was calculated from the particle size spectra detected by the UVP5 as in  
147 (Guidi et al., 2008). Based on the High Pressure Liquid Chromatography (HPLC) analysis of  
148 water collected with Niskin bottles, we used the method of Uitz et al. (2006) to estimate the  
149 contribution (%) of three pigment size classes (microphytoplankton, nanophytoplankton, and  
150 picophytoplankton;  $f_{\text{micro}}$ ,  $f_{\text{nano}}$ , and  $f_{\text{pico}}$ , respectively) to total phytoplankton biomass in  
151 the epipelagic layer. The median value of all hydrological and optical data together with  
152 imaging data were calculated for each of the five horizontal layers sampled by the Multinet for  
153 future data processing. The samples were classified as anoxic, hypoxic and normoxic according  
154 to the oxygen minimum value measured within the towed layer. We used a threshold of  
155  $5\ \mu\text{mol kg}^{-1}$  to classify the stations as anoxic (Roullier et al., 2014) and  $58.5\ \mu\text{mol kg}^{-1}$  (Bode  
156 et al., 2018) to classify them as hypoxic.

### 157 **Zooplankton sampling, digitization, biomass estimates**

158 A Hydrobios Multinet (with a  $300\mu\text{m}$  mesh and an aperture of  $0.25\text{m}^2$ ) was used to  
159 sample zooplankton (Roullier et al., 2014; Pesant et al., 2015) in five distinct water layers  
160 ranging from the surface to occasionally 1300 m depth. The five depth layers were locally  
161 defined as a function of the vertical structure of the water column according to the profiles of  
162 temperature, salinity, fluorescence, nutrients, oxygen, and particulate matter (Pesant et al.,  
163 2015). The Multinet was equipped with a flowmeter to measure the volume of seawater filtered  
164 by each net tow (Pesant et al., 2015). Day and night net tows were conducted at ten stations.  
165 Sampling at the other stations occurred at day or night, depending on cruise schedule and  
166 operational constraints. Once collected, the samples were preserved in a solution of buffered  
167 formaldehyde-Borax solution (4%). In the laboratory, the samples were rinsed and split with a  
168 Motoda box (MOTODA, 1959). The final split was analysed with the Zooscan imaging system  
169 (Gorsky et al., 2010) which allowed a rapid and semi-automatic analysis of zooplankton  
170 samples. In total, the samples comprised nearly 400,000 images of living zooplankton and  
171 detritus. These images were imported into Ecotaxa, an online platform which allows an  
172 automatic prediction of the taxonomic classification of each single image followed by a manual  
173 validation/correction. The organisms were then identified manually down to the order,  
174 sometimes to the family and rarely down to the genus level. All copepods were sorted at the



175 family level apart from the smallest copepods that cannot be recognised at the family level from  
176 the image. They were all grouped into one category called Other-copepoda or other-Calanoidea  
177 if their morphological features allowed classifying them as Calanoidea. This initial sorting  
178 allowed classifying zooplankton into 119 taxa. As many taxa showed a very small contribution  
179 to total zooplankton abundance, the 119 taxa were grouped into 19 taxonomic groups (Table  
180 1). Those include all the major zooplankton groups that are frequently observed in the oceans.  
181 To investigate vertical patterns in mesozooplankton abundance, these 19 groups were further  
182 aggregated into eight groups representing a combination of taxonomic and functional  
183 classification (Table 1).

184 Once the zooplankton images were sorted, Ecotaxa enabled us to extract the  
185 concentration and the biovolume of each mesozooplankton group at every station and for every  
186 net tow, while accounting for the Motoda fraction and the volume sampled. The biovolume was  
187 computed for each individual zooplankton using the minor and major length axes assuming a  
188 prolate ellipsoidal shape (Gorsky et al., 2010). The biomass was calculated for the 8 large  
189 groups using the equations for the different taxa :

$$190 \quad \text{Body Weight}(\mu\text{C}) = aS^b \quad (1)$$

191 where  $S$  is body area in  $\text{mm}^2$ . Taxon-specific area-to-dry mass conversion factors  
192 (Lehette and Hernandez-Leon, 2009) and dry mass to carbon (C) conversion factors (Kjørboe,  
193 2013) were used to calculate the biomass and C content of each zooplankton organism scanned.  
194 Taxonomic units and biomass conversion factors used are listed in Table 2. For large protists  
195 the conversion factor was adjusted to  $0.08 \text{ mgC mm}^{-3}$  (Biard et al., 2016).

196 Shannon diversity index ( $H'$ ) was calculated based on the relative abundances of the  
197 119 taxa for each sample as follows:

$$198 \quad H' = -\sum_i^n p_i \log p_i \quad (2)$$

199 where  $p_i$  is relative abundance of each taxa in one sample and log is the natural  
200 logarithm.

201

## 202 **Analyzing zooplankton and particles vertical distributions**

203 Vertical attenuation rates of zooplankton (abundance and biomass) and estimated  
204 particle fluxes were estimated, from the five sampled layers for zooplankton and from the 5  
205 meter resolution profile of estimated vertical flux using a linear regression of the log-log (i.e.  
206 natural logarithm) with the following equation :

$$207 \quad X = X_0(Z/Z_0)^b \quad (3)$$

208 where  $X$  represents the zooplankton abundance, the zooplankton biomass or the  
209 particle vertical flux at the depth level  $Z$ ,  $X_0$  the zooplankton biomass or abundance and vertical  
210 particle flux at the depth  $Z_0$  (chosen as median depth of the surface net) and  $b$  the slope taken  
211 as a proxy of the attenuation rate of zooplankton biomass zooplankton abundance or particle  
212 flux. In the rest of the manuscript,  $A_{zoo}$  represents the slope  $b$  of vertical profile for  
213 zooplankton abundance,  $B_{zoo}$  the slope  $b$  of vertical profile for zooplankton biomass,  $A_{flux}$   
214 the slope  $b$  of vertical profile for particle flux, and  $P_{flux1}$ ,  $P_{flux2}$  and  $P_{flux3}$  the particle  
215 flux in respectively the epipelagic, upper and lower mesopelagic. To analyse latitudinal patterns  
216 in attenuation rates, the slope values were separated into three latitudinal bands based on the  
217 latitudinal position of their corresponding sampling stations: intertropical ( $0^{\circ}$ - $30^{\circ}$ ), temperate  
218 ( $30^{\circ}$ - $60^{\circ}$ ) and polar ( $60^{\circ}$ - $90^{\circ}$ ). The intertropical stations gathered both OMZ and non-OMZ  
219 stations, which allowed us to analyse the effect of oxygen depletion on zooplankton and  
220 particles. Non-parametric variance analyses (Kruskal and Wallis tests) were performed to test  
221 for differences in slope values (i.e. zooplankton and particles attenuation rates) between  
222 latitudinal bands.

### 223 **Multivariate analysis of community composition**

224 To explore the response of zooplankton community composition to environmental  
225 drivers across depth layers, the non-interpolated abundances of the 19 taxonomic groups  
226 mentioned above were aggregated into three layers: the epipelagic layer (0-200m), the upper  
227 mesopelagic layer (200-500m) and the lower mesopelagic layer (500-1000m). To analyse  
228 separately the three depth layers, the samples collected in overlapping layers (18.59% of the  
229 total samples) were not included in the statistical analysis (Table S1). To characterise the  
230 environmental conditions of each layer at each sampling station the median values of the  
231 following contextual environmental variables were used: temperature (T), salinity (S), oxygen  
232 ( $O_2$ ), nitrate concentration ( $NO_3$ ), chlorophyll  $a$  concentration (Chl $_a$ ), phytoplankton size  
233 fractions ( $f_{micro}$ ,  $f_{nano}$ , and  $f_{pico}$ ), concentration of suspended particles (SPM) and particle  
234 flux (P\_Flux). The measurements of all these environmental variables are available on  
235 PANGAEA (<https://doi.org/10.1594/PANGAEA.840721>).

236 To estimate the strength of the Diel Vertical Migration (DVM) at 10 stations, pairwise  
237 Wilcoxon tests were performed to compare in each layers the abundance and biomass of each  
238 taxa between day and night. For those 10 same pairs of stations, we used an analysis of  
239 similarities (ANOSIM) to test for significant variations in community composition between day  
240 and night samples. The ANOSIM tested whether the inter-groups difference (day and night



241 groups) was higher than the intra-groups difference, by providing an R coefficient. An R  
242 coefficient close to one suggests dissimilarity between groups, while R value close to zero  
243 suggests an even distribution of high and low ranks within and between groups. An R value  
244 below zero suggests that dissimilarities are greater within groups than between groups (Clarke  
245 and Gorley, 2001). ANOSIM tests were performed within each layer using log-transformed  
246 (where log is the natural logarithm) abundances and Bray-Curtis distance among stations.

247 For each depth layer, a canonical redundancy analysis (RDA) was performed based on  
248 the abundances of the 19 mesozooplankton groups and the above-mentioned environmental  
249 variables to explore the explanatory power of these variables in structuring the  
250 mesozooplankton community. The RDA is an extension of the multiple regression analysis  
251 applied to multivariate data (Legendre and Legendre, 1998). It allows representing the response  
252 variables (abundances of the 19 mesozooplankton groups) in a “constrained” reduced space,  
253 i.e., constructed from the explanatory variables (the environmental variables). For each RDA,  
254 the following variables were used as “supplementary variables” of the analysis in order to  
255 visualize their correlation with the environmental structuring of the mesozooplankton  
256 community (i.e., to visualise their position in the RDA space): attenuation of particle flux  
257 ( $A_{flux}$ ), attenuation of zooplankton abundance ( $A_{zoo}$ ), attenuation of zooplankton biomass  
258 ( $B_{zoo}$ ) and the Shannon index ( $H'$ ). Beforehand, a Hellinger transformation was performed  
259 on the mesozooplankton abundances. A preliminary RDA based on all samples together showed  
260 a very strong effect of depth on mesozooplankton community composition (Fig. S1). Therefore,  
261 to avoid such a strong effect of depth on the community composition analysis, three separate  
262 RDAs were performed on each of the three layers defined above. Significant axes were  
263 identified using the Kaiser-Guttman criterion (Legendre and Legendre, 1998).

264 Data manipulation and statistical analyses were performed with Matlab 2018b  
265 (MATLAB 9.5) for the vertical profiles of abundance and biomass and statistical test (Wilcoxon  
266 test, Kruskal-wallis test), R environment v3.5.1 (using the following packages: vegan version  
267 2.5-5, ggplot2 version 3.1.1, ggrepel version 0.8.0 and ggfortify version 0.4.7) for the  
268 redundancy analysis and PRIMER6 (Version 6.1.12) and PERMANOVA+ (Version 1.0.2) for  
269 the ANOSIM test.

## 270 Results

### 271 Day night variability

272 In each layer, the comparison between day/night of the taxonomic groups indicated that  
273 only a few groups (Euphausiidae, Metridinidae, Corycaeidae and Cnidaria for abundance;  
274 Eumalacostraca and Ostracoda for biomass) showed significant differences in either the surface  
275 layer or the upper mesopelagic layer (Table S1). Nonetheless, the ANOSIM found no  
276 significant differences in the community composition between the day and night samples at the  
277 community-level ( $R_{0-200m} = -0.039$ ;  $R_{200-500m} = -0.008$ ;  $R_{500-1100m} = -0.006$ ). The same  
278 analyses based on biomass also indicated no significant differences ( $R_{0-200m} = 0.018$ ;  $R_{200-}$   
279  $500m = -0.051$ ;  $R_{500-1100m} = 0.087$ ). As a consequence, all further analyses were carried out  
280 without making any distinctions between day and night samples.

### 281 Vertical patterns in zooplankton total abundance and biomass and particle flux

282 On a global scale, zooplankton abundance and biomass decreased exponentially with  
283 depth (Fig. 2) in the different latitudinal bins. Abundance and biomass decrease rate with depth  
284 and were correlated ( $r^2=0.342$ ,  $p=4.6 \cdot 10^{-5}$ ) but the biomass attenuation rate estimates were  
285 systematically lower than the attenuation based on the abundance profiles. On average, polar  
286 waters showed increased zooplankton abundance and biomass compared to the stations located  
287 in the tropics. In the epipelagic layer, abundances and biomass ranged from 1 to 5000 ind  $m^{-3}$   
288 and 0.05 to 200 mg C  $m^{-3}$  while in the mesopelagic they were reduced to 0.05 to 450 ind  $m^{-3}$   
289 and 0.005 to 40 mg C  $m^{-3}$ . Copepods were the most abundant being 85% and 65% of the  
290 abundance and biomass in the epipelagic, 85 and 76% in the upper mesopelagic and 95% and  
291 97% in the lower pelagic (Table 3). The estimated vertical flux also decreased with depth in all  
292 latitudinal bands. On average polar waters showed higher fluxes compared to the stations  
293 located in the tropics.

294

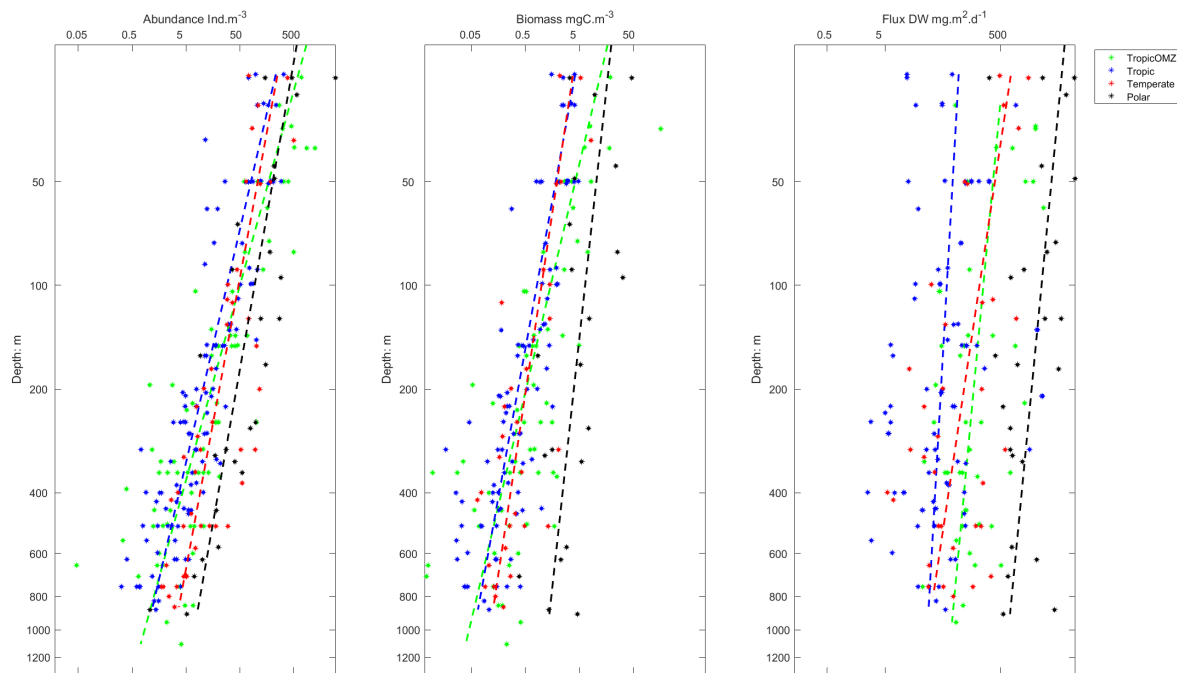

295

296 Fig. 2: Vertical distribution of zooplankton biomass, abundance and particle flux in different latitudinal  
297 bands. Dotted lines represent the fitted linear regression for each latitudinal band (equation 3). The linear  
298 fits to the data point are given in table 4.

299

300 The attenuation rates of zooplankton abundance and biomass with depth were stronger than the  
301 attenuation rates of the vertical particle flux (Fig. 3A, B and C, Table 4). The decrease rates in  
302 zooplankton vertical abundance and biomass are more pronounced in OMZ stations compared  
303 to the non-OMZ stations. Yet, such difference was found to be significant only when the vertical  
304 decrease rates were calculated from abundances. In general, zooplankton attenuation rates  
305 decreased with latitude whereas the attenuation rates of particle fluxes increased with latitude  
306 (Fig. 3, Table 3). A non-parametric variance analysis (Kruskal-Wallis test) of the attenuation  
307 rate revealed significant differences in the attenuation rates of zooplankton abundances between  
308 the anoxic tropical stations and the temperate and polar ones, but not with the other tropical  
309 stations (Table 4). No statistical difference between regions was found. The attenuation rate of  
310 vertical flux was weaker at the OMZ sites compared to the non OMZ ones but this difference  
311 was not significant (Fig. 3B).

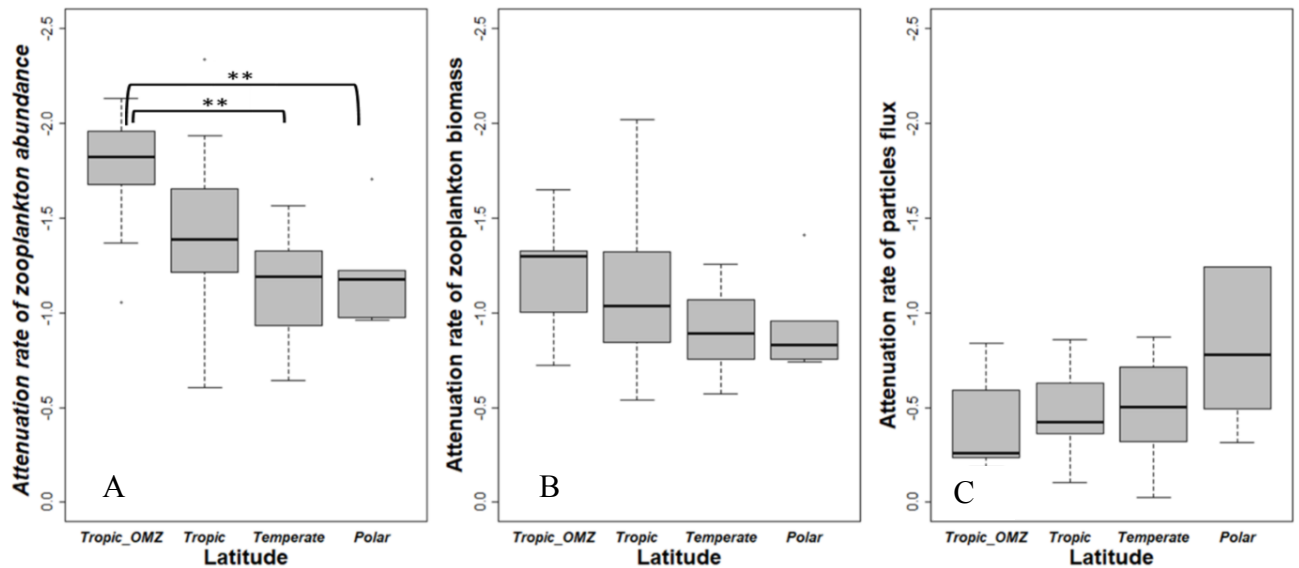

312  
313 Fig. 3: Distributions of attenuation rates at each station per latitudinal bands (Tropical, Tropical  
314 OMZ, Temperate, and Polar). A: Attenuation rate of zooplankton abundance (A\_zoo). B: Attenuation  
315 rate of zooplankton biomass (B\_zoo). C: Attenuation rate of particle flux (A\_flux). (\*\*\*) means  
316 significant Kruskal-Wallis test with  $p < 0.01$  (Table 5).

317

### 318 Structuring of the epipelagic community composition.

319 In the epipelagic layer (0 – 200 m depth), the environmental variables explained 32.71%  
320 of the total variance in mesozooplankton groups' abundances. The first RDA axis (RDA1, 57.18  
321 % of constrained variance) opposed the samples from polar waters, and especially those from  
322 the Arctic dominated by Calanidae and crustacean larvae (RDA1 > 0), to the tropical samples  
323 presenting more even contributions from most of the remaining groups: Protista,  
324 Eumalacostraca, Annelida, Amphipoda, Corycaeidae, Chaetognatha, Euphausiacea,  
325 Oithonidae, Ostracoda, Oncaeidae, Calanoida (RDA1 < 0). RDA1 was negatively scored by  
326 temperature and salinity and positively scored by vertical particle flux, microphytoplankton  
327 contribution, suspended particle concentration, dissolved oxygen concentration and chlorophyll  
328 *a* concentration. Among the supplementary variables, the attenuations of the particle flux and  
329 of the zooplankton biomass were positively correlated with RDA1, while the attenuation of the  
330 zooplankton abundance and the Shannon index were negatively correlated to RDA1. RDA2  
331 (13.1% of constrained variance) opposed the samples from the Indian Ocean and North Atlantic  
332 Ocean that present higher abundances of Cnidaria, Mollusca, Tunicata and Cladocera (RDA2  
333 < 0) to those samples from the Southern Ocean presenting higher abundances of Annelida,  
334 Euphausiacea, Amphipoda and Other Copepoda (RDA2 > 0). RDA2 was positively scored by

335 nitrate concentrations and the relative contribution of nanophytoplankton. It was negatively  
 336 scored by the concentration of suspended particles and the relative contribution of  
 337 microphytoplankton. All supplementary variables were negatively correlated with RDA2.

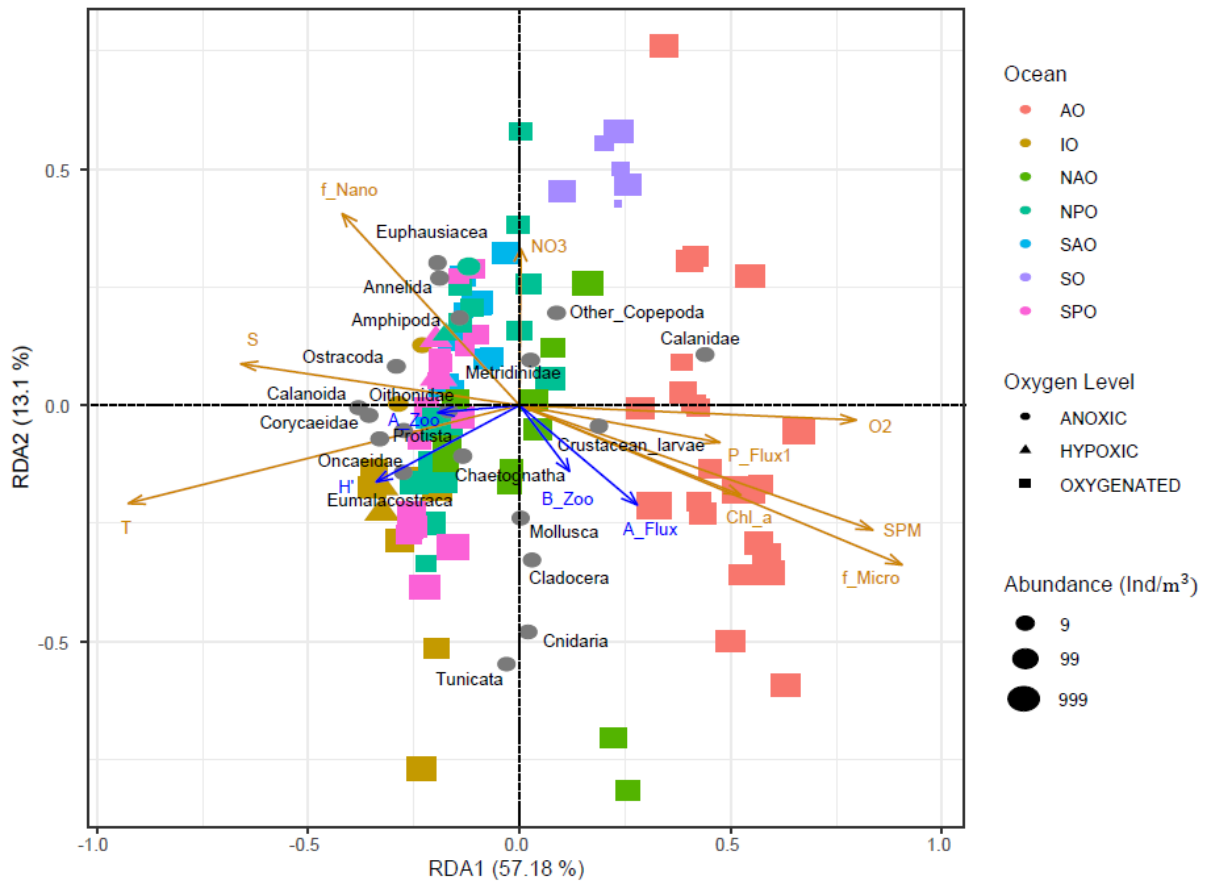

338  
 339 Fig. 4: RDA on the epipelagic communities. Each dot corresponds to a sample, i.e., one net at one depth  
 340 at one station. The orange arrows correspond to the quantitative environmental variables in RDA space:  
 341 f\_pico, f\_nano and f\_micro correspond to the relative contribution (%) of pico-, nano- and micro-  
 342 phytoplankton to total phytoplankton biomass, O2 = dissolved oxygen concentration ( $\mu\text{mol/kg}$ ), Chl\_a  
 343 = Chlorophyll a concentration ( $\text{mg/m}^3$ ), SPM = suspended particles matter ( $\text{m/sr}$ ), T = temperature ( $^{\circ}\text{C}$ ),  
 344 Sal = salinity, NO3 = nitrate concentration ( $\text{mol/kg}$ ), Z = depth (m) and P\_Flux= particulate flux  
 345 ( $\text{mg} \cdot \text{m}^{-2} \cdot \text{d}^{-1}$ ). Grey dots mark the projection of the zooplankton groups abundance ( $\text{ind} \cdot \text{m}^{-3}$ ). Colors  
 346 correspond to the ocean basin where the samples were taken: AO = Arctic Ocean, IO = Indian Ocean,  
 347 NAO = North Atlantic Ocean, NPO = North Pacific Ocean, SAO = South Atlantic Ocean, SO = Southern  
 348 Ocean, SPO = South Pacific Ocean. Shapes illustrate oxygen level, Anoxic:  $[\text{O}_2] < 5 \mu\text{mol/kg}$ ; Hypoxic:  
 349  $5 \mu\text{mol/kg} < [\text{O}_2] < 58.5 \mu\text{mol/kg}$  and oxygenated:  $[\text{O}_2] > 58.5 \mu\text{mol/kg}$ . Supplementary variables estimated  
 350 for the epipelagic layer are represented with blue arrows: attenuation of particle flux (A\_flux),  
 351 attenuation of zooplankton abundance (A\_zoo), attenuation of zooplankton biomass (B\_zoo) and the  
 352 Shannon index ( $H'$ ).

353 **Structuring of the upper mesopelagic community composition.**

354 In the upper mesopelagic layer (200 to 500 m depth), the environmental variables  
355 explained 29% of the total variance in mesozooplankton groups' abundances. Again, the first  
356 RDA axis (RDA1, 36.33% of constrained variance) mainly opposed the polar samples  
357 dominated by Calanidae copepods, and characterized by higher concentrations of suspended  
358 particle, particle flux (both from surface and upper mesopelagic layer), and higher dissolved  
359 oxygen concentrations (RDA1 > 0), from the samples characterized by more diverse  
360 zooplankton communities (mainly Corycaeidae, small Calanoida, Oncaeidae) and correlated to  
361 higher temperature, higher salinity and a higher relative contribution of the nanophytoplankton  
362 (RDA1 < 0). Similarly, to what was observed for the epipelagic layer, among the supplementary  
363 variables, the attenuations of the particle flux and of zooplankton biomass were positively  
364 correlated with RDA1, while the attenuation of zooplankton abundance and the Shannon index  
365 were negatively correlated to RDA1. RDA2 (24.72% of constrained variance) opposed the  
366 anoxic samples from the Indian Ocean presenting higher abundances of Tunicata, Annelida,  
367 Protista, Mollusca, Oithonidae and Cnidaria (RDA2 < 0) to the oxygenated ones displaying  
368 higher abundances of Ostracoda, Eumalacostraca, crustacean larvae, other Copepoda,  
369 Chaetognatha and Euphausiacea (RDA2 > 0). Samples from the Arctic Ocean were dominated  
370 by large copepods from the Calanidae and Metridinidae families. Samples from the Pacific and  
371 Atlantic Oceans were dominated by other Copepoda, Eumalacostraca, Ostracoda,  
372 Euphausiacea, Chaetognatha and crustacean larvae. Higher attenuation rates of zooplankton  
373 biomass and particle flux were found in polar samples whereas higher zooplankton attenuation  
374 rates were found in warmer waters, especially at OMZ stations. Again, samples from the  
375 tropical upper mesopelagic layers displayed more diverse communities. The distribution of the  
376 supplementary variables along RDA2 differed from what was observed for the epipelagic layer,  
377 as the supplementary variables, except the attenuation of the zooplankton abundances, were  
378 positively correlated to RDA2.



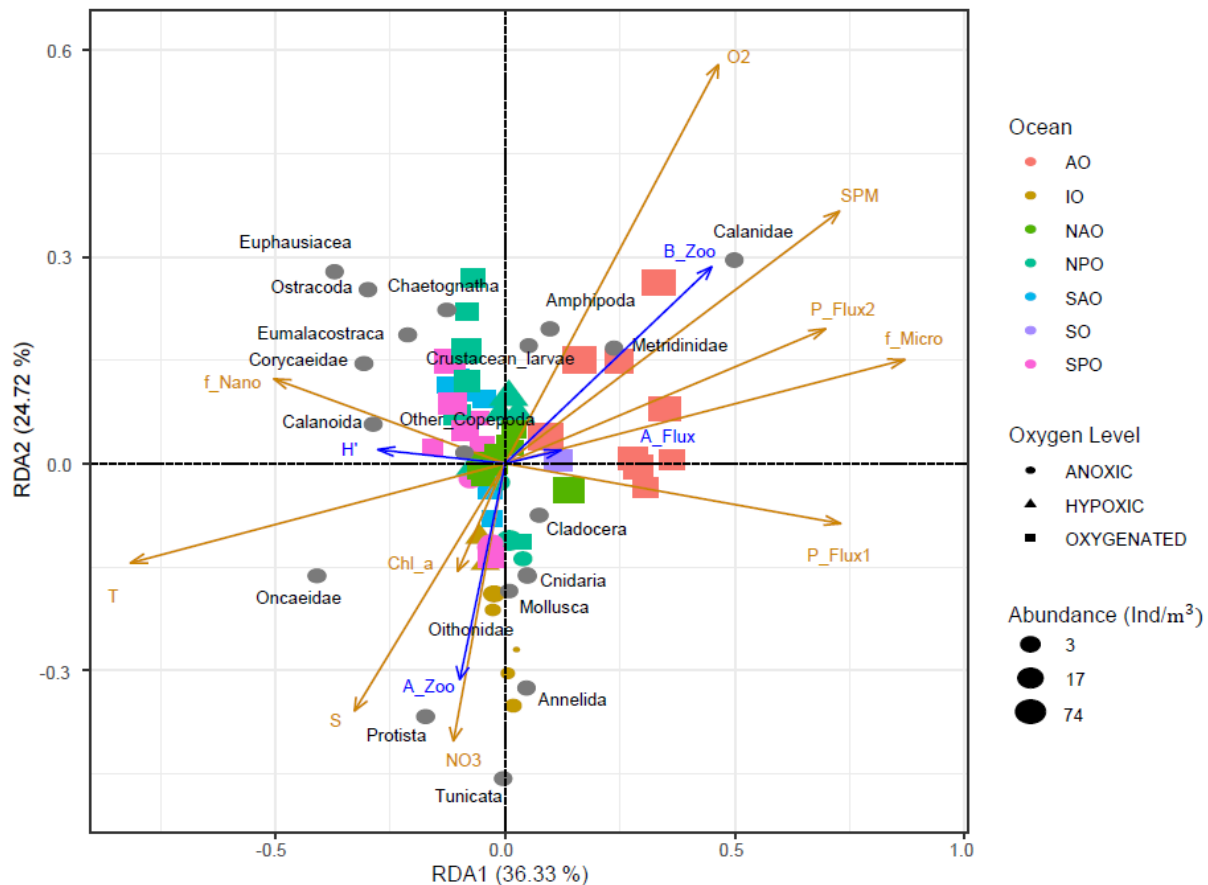

379  
 380 Fig. 5: RDA performed on the upper mesopelagic abundances. Each dot corresponds to a sample, i.e.,  
 381 one net at one depth at one station. The orange arrows correspond to the quantitative environmental  
 382 variables (see legend of Fig. 4). Anoxic:  $[O_2] < 5 \mu\text{mol/kg}$ ; Hypoxic:  $5 \mu\text{mol/kg} < [O_2] < 58.5 \mu\text{mol/kg}$  and  
 383 oxygenated:  $[O_2] > 58.5 \mu\text{mol/kg}$ . Supplementary variables estimated for the upper mesopelagic layer  
 384 are represented with blue arrows: attenuation of particle flux (A\_flux), attenuation of zooplankton  
 385 abundance (A\_zoo), attenuation of zooplankton biomass (B\_zoo) and the Shannon index ( $H'$ ).

### 386 Structuring of the lower mesopelagic community composition

387 In the lower mesopelagic layers (500 to 1000 m depth), the environmental variables  
 388 explained 29.46 % of the total variance in mesozooplankton groups' abundances. The first RDA  
 389 axis (RDA1, 35.14 % of constrained variance) opposed the stations from the Arctic and North  
 390 Atlantic Oceans characterized by higher dissolved oxygen concentrations, higher suspended  
 391 particle concentrations (RDA1 > 0), from the anoxic and nitrate-rich stations from the Indian  
 392 Ocean (RDA1 < 0). The former stations were characterized by higher abundances of Calanidae,  
 393 Calanoida, Metridinidae, crustacean larvae, Ostracoda and Amphipoda, whereas the latter were  
 394 characterized by higher abundances of Tunicata, Annelida, Eumalacostraca and other  
 395 Copepoda. RDA2 (22.08 % of constrained variance) separated the colder and less salty stations  
 396 of the Southern Atlantic Ocean (RDA2 < 0) from the warmer, saltier stations (RDA2 > 0) of

397 the North Atlantic and the Indian Oceans that are characterized by less diverse zooplankton  
 398 communities. The stations that sampled the oxygenated waters of the North Atlantic and Arctic  
 399 Oceans were dominated by large copepods of the Metridinidae and Calanidae families, as well  
 400 as most of the small other Calanoida (i.e. those smaller copepods that could not be recognized at  
 401 a more detailed taxonomic level) in addition to Ostracoda, Amphipoda, and crustacean larvae.  
 402 Oxygenated stations from the South Atlantic Ocean (SAO) were characterized by higher  
 403 abundances of Chaetognatha, Corycaeidae, Euphausiacea, Cnidaria, Mollusca, Oithonidae,  
 404 Oncaeidae and Protista. Samples taken in the OMZ of the Indian and North Pacific Oceans  
 405 displayed higher abundances of other Copepoda, Tunicata, Annelida, Eumalacostraca and  
 406 Protista. Higher mesozooplankton biomass and stronger particle flux attenuation rates were  
 407 found in the normoxic waters while higher zooplankton attenuation rates were observed at the  
 408 stations that sampled an OMZ. The distribution of the supplementary variables showed similar  
 409 association with environmental variables as in the upper mesopelagic.  
 410

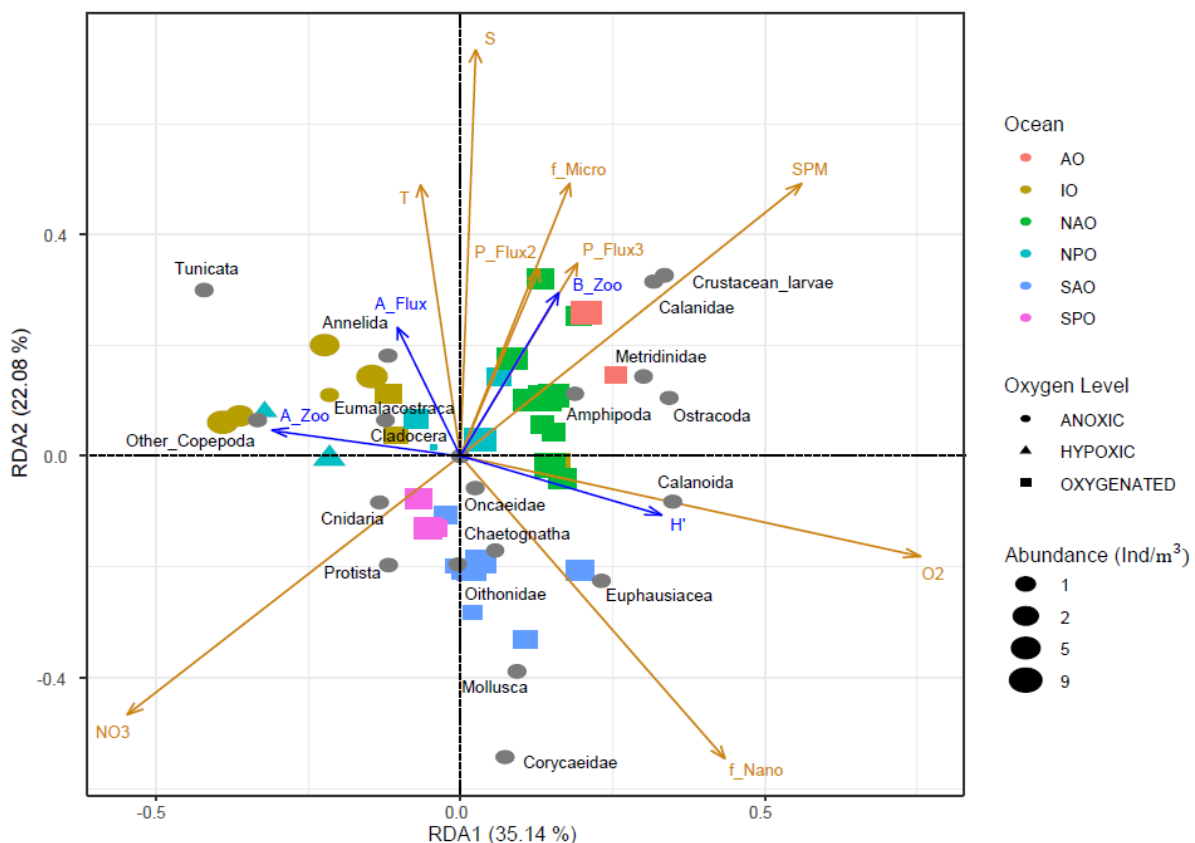

411  
 412 Fig. 6: RDA performed on the lower mesopelagic abundances. Each dot corresponds to a sample, i.e.,  
 413 one net at one depth at one station. The orange arrows correspond to the quantitative environmental  
 414 variables (see legend of Fig. 4). Anoxic:  $[O_2] < 5 \mu\text{mol/kg}$ ; Hypoxic:  $5 \mu\text{mol/kg} < [O_2] < 58.5 \mu\text{mol/kg}$  and  
 415 oxygenated:  $[O_2] > 58.5 \mu\text{mol/kg}$ . Supplementary variables estimated for the lower mesopelagic layer

416 are represented with blue arrows: attenuation of particle flux ( $A_{\text{flux}}$ ), attenuation of zooplankton  
417 abundance ( $A_{\text{zoo}}$ ), attenuation of zooplankton biomass ( $B_{\text{zoo}}$ ) and the Shannon index ( $H'$ ).

418

419

## 420 **Discussion**

421           The present global analysis of spatial patterns of the mesozooplankton community and  
422 their relationship with the strength of the vertical particle flux is based on zooplankton  
423 abundance and biomass estimates and vertical particles flux estimated using state-of-the-art  
424 imaging techniques (Zooscan and UVP5). The rigorous quality control (see Supplementary  
425 Material) allows to depict with confidence correlations between zooplankton and particle flux,  
426 two important components of the biological carbon pump (BCP). Notably the study allows to  
427 infer global ecological patterns in the epipelagic and mesopelagic layers, the coupling between  
428 these two layers in oxygenated, hypoxic and anoxic situations.

### 429 **Important environmental factors for the mesozooplankton community composition in the** 430 **epipelagic layer**

431           High latitude marine ecosystems are characterised by a combination of lower species  
432 diversity and shorter food webs (Laws, 1985; Stempniewicz et al., 2007) sustained by higher  
433 concentrations of large microphytoplankton cells (diatoms). On the contrary, low latitude  
434 ecosystems are featured by more complex and diverse food webs (Saporiti et al., 2015; Uitz et  
435 al., 2006) adapted to lower production rates ensured by smaller cells (i.e. pico- and  
436 nanoplankton). How the dynamics of zooplankton community composition and vertical particle  
437 flux follow this scheme remains more elusive. Previous field-based studies reported peaks in  
438 zooplankton species richness in the tropics (Rombouts et al., 2010; Rutherford et al., 1999;  
439 Yasuhara et al., 2012), which is in line with the above-mentioned theory that the tropical food-  
440 depleted regions promote more complex food-webs with higher species richness. Our RDAs  
441 results result supports the view that, on a global scale, temperature and the production regime  
442 of surface ecosystems are the main drivers of zooplankton community structure in the  
443 epipelagic layer. Therefore, our observations fall in line with the theory described above: in the  
444 epipelagic layers, less abundant and more diverse zooplankton thrive in warm, pico- and  
445 nanophytoplankton-dominated waters contrary to the polar waters where zooplankton is much  
446 more abundant but less diverse. Polar waters are characterised by a higher contribution of  
447 microphytoplankton to total phytoplankton biomass and higher concentrations of particles. Our  
448 results also indicate that the two polar communities are not completely alike, as the Arctic is  
449 dominated by calanoid copepods while euphausiids and small undetermined copepods  
450 dominate in the few stations sampled in the Southern Ocean. Such differentiation has been  
451 previously shown by several authors who found that Arctic zooplankton were dominated by  
452 *Calanus* spp. (Balazy et al., 2018; Hirche and Mumm, 1992), whereas it was shown that

453 Antarctic zooplankton were dominated by euphausiids, small calanoids, cyclopoids (i.e.  
454 *Oithona* spp., *Oncaea* spp.) and salps (Park and Wormuth, 1993; Quetin et al., 1996; Ross et  
455 al., 2008).

#### 456 **Important environmental factors for the mesozooplankton community structure in the** 457 **mesopelagic layer**

458 The RDA displayed similar general patterns in both the upper and lower mesopelagic  
459 layers with the stations in the Indian Ocean (with low zooplankton concentration in low oxygen)  
460 and Arctic Ocean (with high zooplankton concentration in oxygenated conditions) being in all  
461 layers well separated from the other stations in the remaining ocean. The highest mesopelagic  
462 zooplankton concentrations were found at stations associated with high microphytoplankton  
463 concentrations in the epipelagic and high particle flux, suggesting a strong impact of surface  
464 production regime on the mesozooplankton in the mesopelagic (Hernández-León et al., 2020).  
465 The inter-basin differences in zooplankton concentration and community composition was  
466 slightly lower in the lower mesopelagic compared to the upper mesopelagic, probably due to  
467 the more homogeneous habitat (Fernández de Puelles et al., 2019).

468 In general, stations associated with anoxic or hypoxic conditions at midwater depth  
469 displayed lower zooplankton concentrations in the mesopelagic and different community  
470 composition from oxygenated layers. The stations that sampled the tropical OMZ showed  
471 higher proportions of gelatinous carnivorous zooplankton (Cnidaria), gelatinous filter feeders  
472 (Tunicata), Mollusca and small omnivorous grazers (Cladocera). Anoxic or strongly hypoxic  
473 conditions in the mesopelagic may have selected for those taxa adapted to low oxygen (Vaquer-  
474 Sunyer and Duarte, 2008). In mesopelagic oxygenated waters, the stations of the Tropical  
475 Pacific Ocean displayed a higher diversity stemming from the higher and relatively even  
476 abundances of large protists (i.e. Rhizaria and Foraminifera), chaetognaths, crustaceans  
477 (Ostracods, Euphausiacea, Eumalacostraca, Amphipoda), and various copepod families  
478 (Corycaeidae, Oithonidae, Oncaeidae, small Calanoida). These zooplankton communities were  
479 associated with oligotrophic conditions at surface (Fig. 4), lower zooplankton abundances,  
480 lower concentrations of suspended matter, weaker particle fluxes and weaker attenuation rates  
481 (Fig. 3B) and with stronger attenuation rates of organisms' abundances (Fig. 3A). Therefore,  
482 we evidence oligotrophic regimes where the zooplankton community constitutes a network of  
483 diverse taxa that is not as efficient at using the low amount of material fluxing. Our results are  
484 consistent with previous studies suggesting that those oligotrophic regimes can be relatively  
485 efficient at exporting the slow-sinking fraction of the little carbon that is produced in the surface

486 layers due to a low impact of zooplankton grazing on the sinking particles (Guidi et al., 2009;  
487 Henson et al., 2015). This could help explain why we found the lowest particle flux attenuation  
488 rates in the tropics.

### 489 **Global vertical patterns of zooplankton and particle flux**

490 The concentration and biomass of various zooplankton groups decreased with depth  
491 (Fig. S1), confirming the general trend of decreasing zooplankton abundance and biomass from  
492 the surface to 1000 m depth resolved (Fig. 2; Bode et al., 2018; Brugnano et al., 2012;  
493 Hernández-León et al., 2020; Koppelman et al., 2005; Kosobokova and Hopcroft, 2010;  
494 Yamaguchi et al., 2004). Among these earlier studies, two models for the attenuation of  
495 zooplankton have been proposed: an exponential or a power model. Here, we used the power  
496 model (equation 1) because it was widely used to model vertical flux attenuation rates (Martin  
497 et al., 1987). Based on this power model, we observed rates of decrease in zooplankton  
498 abundance or biomass (Fig. 3) that were in the same range as those reported in the western  
499 Pacific Ocean (-1.52 to -1.41 for abundance and -1.32 to -1.10 for biomass, (Yamaguchi et al.,  
500 2002). Zooplankton abundance decreased more rapidly with depth than biomass as the average  
501 size of organisms increased with depth, confirming that the contribution of larger species  
502 increases with depth (Homma and Yamaguchi, 2010; Yamaguchi et al., 2002). Considering a  
503 larger latitudinal band than earlier studies who found weak regional or global patterns  
504 (Hernández-León et al., 2020; Puelles et al., 2019), we showed that the rates of zooplankton  
505 attenuation vary with latitude and to a lesser extent with oxygen concentrations (Fig. 3) and  
506 also in the opposite direction of the flux attenuation.

507 Stronger surface particle fluxes and vertical attenuation rates were found at higher  
508 latitudes where primary production is mainly ensured by the microphytoplankton and weaker  
509 flux and attenuation was found in the low latitude dominated by picophytoplankton (Fig.4).  
510 Such latitudinal pattern in particle attenuation rates results from the gradient in the production  
511 regime and has been observed quasi-systematically with imaging systems on global scales  
512 (Guidi et al., 2015), but also based on sediment traps (Berelson, 2001) or combining sediment  
513 traps with satellite-based estimates of primary production (Henson et al., 2012). However,  
514 several short-term experiments at selected sites from temperate to tropical latitudes of the  
515 Pacific and Atlantic, showed an opposite pattern with stronger flux and attenuation in cold and  
516 productive regions compared to inter-tropical oligotrophic (Buesseler et al., 2007; Marsay et  
517 al., 2015). The inconsistency of the observations is difficult to explain although it was noted  
518 that depth varying remineralisation due to varying temperature may reconcile the contrasted



519 results (Marsay et al., 2015). It is possible that some of the differences arise from the use of  
520 different methodologies (instruments, time scale, global representation of the dataset) to address  
521 the complexity of the processes to be measured simultaneously.

522 Such opposite pattern between A\_Zoo and B\_zoo in one hand and A\_Flux in the other  
523 hand supports the view that the abundant zooplankton community plays a crucial role in flux  
524 attenuation in productive layers, by feeding and fragmenting the sinking material as suggested  
525 in previous studies (Dilling and Alldredge, 2000; Lampitt et al., 1990; Sarah L. C. Giering et  
526 al., 2014; Stemmann et al., 2004). However, on average and more importantly at high latitudes,  
527 zooplankton attenuation rates were stronger than the vertical flux attenuation rates (Fig. 3)  
528 indicating that zooplankton vertical zonation may be affected by other processes than the  
529 resources provided by the flux of organic matter from the epipelagic layer. In the inter-tropical  
530 OMZ regions, zooplankton vertical attenuation rates were maximum when the vertical  
531 attenuation of the particle's flux was minimum. Previous studies have reported lower flux  
532 attenuation rates in the OMZ of the Arabian Sea (Haake et al., 1992; Roullier et al., 2014), and  
533 Eastern Tropical North Pacific (Cavan et al., 2017; Van Mooy et al., 2002). Lower zooplankton  
534 activity together with reduced bacterial activity (Cram et al., 2021) would allow sinking  
535 particles to transit through the OMZ core without being severely degraded (Wishner et al., 2008,  
536 1995) .

537

### 538 **Sensitivity of plankton and vertical flux to contrasted oxygen conditions**

539 By comparing zooplankton communities from inter-tropical stations with those from  
540 oxygenated mesopelagic layers to stations from OMZs, our analysis brought additional  
541 evidence that change in zooplankton community composition may affect the efficiency of the  
542 BCP. The zooplankton community sampled in the Indian Ocean OMZ displayed a particular  
543 composition compared to the other samples, which is in line with the increasing number of  
544 studies that document the profound impact of oxygen depletion on pelagic organisms (Ekau et  
545 al., 2010; Hauss et al., 2016; Wishner et al., 2018). Our results underlined how the OMZ can  
546 strongly reduce the abundance of several zooplankton groups (i.e. Calanoida, Euphausiacea,  
547 Amphipoda, Ostracoda) that are outcompeted by more hypoxia-tolerant ones. We found that  
548 tunicates (mostly Appendicularia), large protists (Collodaria and Foraminifera), polychaetes,  
549 Oncaeidae, Oithinidae and to a lesser extent Cnidaria (jellyfishes) may tolerate OMZ  
550 conditions, since their abundance at OMZ and at non-OMZ stations did not present significant  
551 differences. All of these zooplankton groups have been reported as being able to thrive or

552 endure at low oxygen concentrations in various OMZs (Ekau et al., 2010; Hauss et al., 2016;  
553 Keister and Tuttle, 2013; Kiko and Hauss, 2019; Parris et al., 2014; Tutası and Escribano, 2020;  
554 Werner and Buchholz, 2013; Wishner et al., 2020). Those “hypoxiphilic” or hypoxia-tolerant  
555 taxa display special adaptations that enable them to remain at extremely low oxygen  
556 concentrations where other zooplankton groups cannot, because they fail to meet their  
557 metabolic oxygen demand (Childress and Seibel, 1998; Seibel, 2011). Jellyfish and large  
558 protists benefit from their passive feeding tactics which are less oxygen-demanding than active  
559 cruising and filter feeding (Kiørboe, 2011). Indeed, hypoxia-tolerant taxa can also display  
560 behavioral adaptations that cut down the metabolic costs associated with active feeding or the  
561 active search for mates in the water column. Copepod species belonging to the Oncaeidae and  
562 Oithonidae families are known for performing ambush feeding tactics or to attach themselves  
563 on large detritus (Brun et al., 2017), which allows them to capture small preys or to feed on  
564 falling detritus at very low metabolic costs. Therefore, these less motile copepods frequently  
565 outcompete most of their calanoid congeners in OMZs and often co-occur with Appendicularia,  
566 as those discard particle-rich aggregates on which the copepods feed (Alldredge, 1972; Brun et  
567 al., 2017; Kiørboe, 2011). Other possible adaptations consist in the use of lipid storages and  
568 metabolic suppression (Wishner et al., 2020). Some organisms conduct a diapause in the OMZ  
569 for an extended period, allowing them to avoid foraging predators and to complete their life  
570 cycle (Arashkevich et al., 1996). Diapause reduces energetic costs and thus allows the  
571 organisms to survive in resource-depleted conditions. Metabolic suppression goes hand in hand  
572 with the diapause, but can also occur on shorter time scales, e.g. when organisms stay at OMZ  
573 depth during diel vertical migrations. Diapause and metabolic suppression are associated with  
574 reduced respiratory and locomotor activity. Feeding on and disruption of particles could  
575 therefore be reduced at OMZ depth not only due to the exclusion of many hypoxia intolerant  
576 zooplankton organisms, but also due to the reduced activity of those zooplankton organisms  
577 that can cope with OMZ conditions. The zooplankton groups we found to characterize the  
578 community inhabiting the hypoxic and anoxic layers are those that commonly outcompete  
579 others in OMZs worldwide. They could benefit from the likely future expansion of OMZ  
580 (Oschlies et al., 2018) and thus become increasingly abundant with future climate change. This  
581 would probably result in enhanced vertical particle flux in those regions. However, this requires  
582 further research as some of these organisms could already be living near their physiological  
583 hypoxia tolerance limits (Wishner et al., 2018).

## 584 **Conclusions**

585           Our study combined consistent and large-scale observations of zooplankton abundance,  
586 biomass and community composition with estimates of vertical particle fluxes obtained through  
587 imaging system pipelines. We showed that consistent observations can be obtained at a global  
588 level using in situ camera systems and precise net sampling in various ecosystems  
589 representative of different ocean conditions. In future surveys, consistently combining these  
590 techniques with acoustic and other bio-optical sensors will allow the measurement of the  
591 vertical and horizontal distribution of organisms with greater precision. We showed that the key  
592 environmental variables driving epipelagic mesozooplankton community structure at the global  
593 scale are temperature, phytoplankton biomass and phytoplankton key groups. In the  
594 mesopelagic layer, surface phytoplankton size classes, particle concentration, temperature and  
595 oxygen availability were identified as the main drivers of mesozooplankton community  
596 structure. Our work furthermore suggests that low attenuation of zooplankton abundance and  
597 biomass go in hand with high particle flux attenuation and vice versa. Such information is  
598 crucial for the parameterization of the next generation of marine ecosystem models that describe  
599 complex zooplankton-related processes based on coarse but increasingly numerous functional  
600 types. Such models suggest that surface phytoplankton biomass and size classes, the flux of  
601 particles and the oxygen content in the mesopelagic layer will all be affected further by global  
602 climate change. The fact that zooplankton communities are sensitive to those factors suggests  
603 that future climatic changes may profoundly alter zooplankton communities worldwide, at the  
604 surface but also in the deeper mesopelagic layer.

605

## 606 **ACKNOWLEDGMENTS**

607           Tara Oceans (which includes both the Tara Oceans and Tara Oceans Polar Circle  
608 expeditions) would not exist without the leadership of the Tara Ocean Foundation and the  
609 continuous support of 23 institutes (<https://oceans.taraexpeditions.org/>). This study is part of  
610 the “Ocean Plankton, Climate and Development” project funded by the French Facility for  
611 Global Environment (FFEM). Y.D.S. and M.C.B. received financial support from FFEM to  
612 execute the project. R.K acknowledges support support via a “Make Our Planet Great Again”  
613 grant of the French National Research Agency within the “Programme d’Investissements  
614 d’Avenir”; reference “ANR-19-MPGA-0012”. F.B. received support from ETH Zürich and the  
615 European Union’s Horizon 2020 research and innovation programme under grant agreement  
616 n°SEP-210591007. We further thank the commitment of the following sponsors: CNRS (in

617 particular Groupement de Recherche GDR3280 and the Research Federation for the Study of  
618 Global Ocean Systems Ecology and Evolution FR2022/Tara Oceans-GOSEE), the European  
619 Molecular Biology Laboratory (EMBL), the French Ministry of Research, and the French  
620 Government “Investissements d’Avenir” programs OCEANOMICS (ANR-11-BTBR-0008),  
621 the EMBRC-France (ANR-10-INBS-02). Funding for the collection and processing of the Tara  
622 Oceans data set was provided by NASA Ocean Biology and Biogeochemistry Program under  
623 grants NNX11AQ14G, NNX09AU43G, NNX13AE58G, and NNX15AC08G (to the  
624 University of Maine); the Canada Excellence research chair on remote sensing of Canada’s new  
625 Arctic frontier; and the Canada Foundation for Innovation. We also thank Agnès b. and Etienne  
626 Bourgois, the Prince Albert II de Monaco Foundation, the Veolia Foundation, Region Bretagne,  
627 Lorient Agglomeration, Serge Ferrari, Worldcourier, and KAUST for support and commitment.  
628 The global sampling effort was enabled by countless scientists and crew who sampled aboard  
629 the Tara from 2009–2013, and we thank MERCATOR-CORIOLIS and ACRI-ST for providing  
630 daily satellite data during the expeditions. We are also grateful to the countries who graciously  
631 granted sampling permission.

632

633 References

- 634  
635 Allredge, A.L., 1972. Abandoned larvacean houses : a unique food source in pelagic  
636 environment. *Science* 177, 885.
- 637 Andersen, V., Francois, F., Sardou, J., Picheral, M., Scotto, M., Nival, P., 1998. Vertical  
638 distributions of macroplankton and micronekton in the Ligurian and Tyrrhenian Seas  
639 (northwestern Mediterranean). *Oceanologica Acta* 21, 655–676.
- 640 Arashkevich, E., Drits, A., Timonin, A., 1996. Diapause in the life cycle of *Calanoides*  
641 *carinatus* (Kroyer),(Copepoda, Calanoida). *Hydrobiologia* 320, 197–208.
- 642 Balazy, K., Trudnowska, E., Wichorowski, M., Błachowiak-Samołyk, K., 2018. Large  
643 versus small zooplankton in relation to temperature in the Arctic shelf region. *Polar*  
644 *Research* 37, 1427409.
- 645 Banse, K., 1964. On the vertical distribution of zooplankton in the sea. *Progress in*  
646 *oceanography* 2, 53–125.
- 647 Beaugrand, G., Conversi, A., Atkinson, A., Cloern, J., Chiba, S., Fonda-Umani, S., Kirby,  
648 R.R., Greene, C.H., Goberville, E., Otto, S.A., Reid, P.C., Stemmann, L., Edwards,  
649 M., 2019. Prediction of unprecedented biological shifts in the global ocean. *Nature*  
650 *Climate Change* 9, 237–+. <https://doi.org/10.1038/s41558-019-0420-1>
- 651 Berelson, W.M., 2002. Particle settling rates increase with depth in the ocean. *Deep-Sea*  
652 *Research Part II-Topical Studies in Oceanography* 49, 237–251.
- 653 Berelson, W.M., 2001. The Flux of Particulate Organic Carbon Into the Ocean Interior:  
654 A Comparison of Four U.S. JGOFS Regional Studies. *Oceanography* 14, 59–67.
- 655 Biard, T., Stemmann, L., Picheral, M., Mayot, N., Vandromme, P., Hauss, H., Gorsky,  
656 G., Guidi, L., Kiko, R., Not, F., 2016. In situ imaging reveals the biomass of giant  
657 protists in the global ocean. *Nature* 532, 504–+. <https://doi.org/10.1038/nature17652>
- 658 Bode, M., Hagen, W., Cornils, A., Kaiser, P., Auel, H., 2018. Copepod distribution and  
659 biodiversity patterns from the surface to the deep sea along a latitudinal transect in the  
660 eastern Atlantic Ocean (24°N to 21°S). *Progress in Oceanography* 161, 66–77.  
661 <https://doi.org/10.1016/j.pocean.2018.01.010>
- 662 Böttger-Schnack, R., 1996. Vertical structure of small metazoan plankton, especially  
663 noncalanoid copepods. I. Deep Arabian Sea. *Journal of Plankton Research* 18, 1073–  
664 1101. <https://doi.org/10.1093/plankt/18.7.1073>
- 665 Brugnano, C., Granata, A., Guglielmo, L., Zagami, G., 2012. Spring diel vertical  
666 distribution of copepod abundances and diversity in the open Central Tyrrhenian Sea  
667 (Western Mediterranean). *Journal of Marine Systems* 105, 207–220.
- 668 Brun, P., Payne, M.R., Kiørboe, T., 2017. A trait database for marine copepods. *Earth*  
669 *System Science Data* 9, 99–113.
- 670 Buesseler, K.O., Lamborg, C.H., Boyd, P.W., Lam, P.J., Trull, T.W., Bidigare, R.R.,  
671 Bishop, J.K.B., Casciotti, K.L., Dehairs, F., Elskens, M., Honda, M., Karl, D.M.,  
672 Siegel, D.A., Silver, M.W., Steinberg, D.K., Valdes, J., Van Mooy, B., Wilson, S.,  
673 2007. Revisiting Carbon Flux Through the Ocean’s Twilight Zone. *Science* 316, 567–  
674 570. <https://doi.org/10.1126/science.1137959>
- 675 Cavan, E.L., Henson, S.A., Belcher, A., Sanders, R., 2017. Role of zooplankton in  
676 determining the efficiency of the biological carbon pump. *Biogeosciences* 14, 177–  
677 186.
- 678 Childress, J.J., Seibel, B.A., 1998. Life at stable low oxygen levels: adaptations of animals  
679 to oceanic oxygen minimum layers. *The Journal of experimental biology* 201, 1223–  
680 1232.
- 681 Chust, G., Allen, J.I., Bopp, L., Schrum, C., Holt, J., Tsiaras, K., Zavatarelli, M., Chifflet,  
682 M., Cannaby, H., Dadou, I., 2014. Biomass changes and trophic amplification of

- 683 plankton in a warmer ocean. *Global Change Biology* 20, 2124–2139.
- 684 Coma, R., Ribes, M., Serrano, E., Jiménez, E., Salat, J., Pascual, J., 2009. Global  
685 warming-enhanced stratification and mass mortality events in the Mediterranean.  
686 *Proceedings of the National Academy of Sciences* 106, 6176–6181.
- 687 Cram, J., Fuchsman, C., Duffy, M., Pretty, J., Lekanoff, R., Neibauer, J., Leung, S.,  
688 Huebert, K.B., Weber, T., Bianchi, D., 2021. Slow particle remineralization, rather  
689 than suppressed disaggregation, drives efficient flux transfer through the Eastern  
690 Tropical North Pacific Oxygen Deficient Zone. *Earth and Space Science Open Archive*  
691 *ESSOAr*.
- 692 Dilling, L., Alldredge, A.L., 2000. Fragmentation of marine snow by swimming  
693 macrozooplankton: A new process impacting carbon cycling in the sea. *Deep-Sea*  
694 *Research Part I-Oceanographic Research Papers* 47, 1227–1245.
- 695 Ekau, W., Auel, H., Portner, H.O., Gilbert, D., 2010. Impacts of hypoxia on the structure  
696 and processes in pelagic communities (zooplankton, macro-invertebrates and fish).  
697 *Biogeosciences* 7, 1669–1699. <https://doi.org/10.5194/bg-7-1669-2010>
- 698 Everett, J.D., Baird, M.E., Buchanan, P., Bulman, C., Davies, C., Downie, R., Griffiths,  
699 C., Heneghan, R., Kloser, R.J., Laiolo, L., 2017. Modeling what we sample and  
700 sampling what we model: challenges for zooplankton model assessment. *Frontiers in*  
701 *Marine Science* 4, 77.
- 702 Fernández de Puelles, M., Gazá, M., Cabanellas-Reboredo, M., Santandreu, M., Irigoien,  
703 X., González-Gordillo, J.I., Duarte, C.M., Hernández-León, S., 2019. Zooplankton  
704 abundance and diversity in the tropical and subtropical ocean. *Diversity* 11, 203.
- 705 Forest, A., Babin, M., Stemmann, L., Picheral, M., Sampei, M., Fortier, L., Gratton, Y.,  
706 Belanger, S., Devred, E., Sahlin, J., Doxaran, D., Joux, F., Ortega-Retuerta, E., Martin,  
707 J., Jeffrey, W.H., Gasser, B., Miquel, J.C., 2013. Ecosystem function and particle flux  
708 dynamics across the Mackenzie Shelf (Beaufort Sea, Arctic Ocean): an integrative  
709 analysis of spatial variability and biophysical forcings. *Biogeosciences* 10, 2833–  
710 2866. <https://doi.org/10.5194/bg-10-2833-2013>
- 711 Gaard, E., Gislason, A., Falkenhaug, T., Søiland, H., Musaeva, E., Vereshchaka, A.,  
712 Vinogradov, G., 2008. Horizontal and vertical copepod distribution and abundance on  
713 the Mid-Atlantic Ridge in June 2004. *Deep Sea Research Part II: topical studies in*  
714 *oceanography* 55, 59–71.
- 715 Gallienne, C.P., Robins, D.B., Woodd-Walker, R.S., 2001. Abundance, distribution and  
716 size structure of zooplankton along a 20 degrees west meridional transect of the  
717 northeast Atlantic Ocean in July. *Deep-Sea Research Part II-Topical Studies in*  
718 *Oceanography* 48, 925–949.
- 719 Gehlen, M., Bopp, L., Ernprin, N., Aumont, O., Heinze, C., Raguencau, O., 2006.  
720 Reconciling surface ocean productivity, export fluxes and sediment composition in a  
721 global biogeochemical ocean model. *Biogeosciences* 3, 521–537.
- 722 Guidi, L., Chaffron, S., Bittner, L., Eveillard, D., Larhlimi, A., Roux, S., Darzi, Y., Audic,  
723 S., Berline, L., Brum, J.R., Coelho, L.P., Espinoza, J.C.I., Malviya, S., Sunagawa, S.,  
724 Dimier, C., Kandels-Lewis, S., Picheral, M., Poulain, J., Searson, S., Stemmann, L.,  
725 Not, F., Hingamp, P., Speich, S., Follows, M., Karp-Boss, L., Boss, E., Ogata, H.,  
726 Pesant, S., Weissenbach, J., Wincker, P., Acinas, S.G., Bork, P., de Vargas, C.,  
727 Iudicone, D., Sullivan, M.B., Raes, J., Karsenti, E., Bowler, C., Gorsky, G., Tara  
728 Oceans Consortium Coordinator, 2016. Plankton networks driving carbon export in  
729 the oligotrophic ocean. *Nature* 532, 465-+.
- 730 Guidi, L., Jackson, G.A., Stemmann, L., Miquel, J.C., Picheral, M., Gorsky, G., 2008.  
731 Relationship between particle size distribution and flux in the mesopelagic zone.  
732 *Deep-Sea Research Part I-Oceanographic Research Papers* 55, 1364–1374.



- 733 Guidi, L., Legendre, L., Reygondeau, G., Uitz, J., Stemann, L., Henson, S.A., 2015. A  
734 new look at ocean carbon remineralization for estimating deepwater sequestration.  
735 *Global Biogeochem. Cycles* 29, 1044–1059. <https://doi.org/10.1002/2014gb005063>
- 736 Guidi, L., Stemann, L., Jackson, G.A., Ibanez, F., Claustre, H., Legendre, L., Picheral,  
737 M., Gorsky, G., 2009. Effects of phytoplankton community on production, size and  
738 export of large aggregates: A world-ocean analysis. *Limnology and Oceanography* 54,  
739 1951–1963. <https://doi.org/10.4319/lo.2009.54.6.1951>
- 740 Haake, B., Ittekkot, V., Ramaswamy, V., Nair, R., Honjo, S., 1992. Fluxes of amino acids  
741 and hexosamines to the deep Arabian Sea. *Marine Chemistry* 40, 291–314.
- 742 Hauss, H., Christiansen, S., Schütte, F., Kiko, R., Edvam Lima, M., Rodrigues, E.,  
743 Karstensen, J., Löscher, C.R., Körtzinger, A., Fiedler, B., 2016. Dead zone or oasis in  
744 the open ocean? Zooplankton distribution and migration in low-oxygen medowater  
745 eddies. *Biogeosciences* 13, 1977–1989.
- 746 Henson, S.A., Sanders, R., Madsen, E., 2012. Global patterns in efficiency of particulate  
747 organic carbon export and transfer to the deep ocean. *Global Biogeochemical Cycles*  
748 26.
- 749 Henson, S.A., Yool, A., Sanders, R., 2015. Variability in efficiency of particulate organic  
750 carbon export: A model study. *Global Biogeochemical Cycles* 29, 33–45.
- 751 Hernández-León, S., Koppelman, R., Fraile-Nuez, E., Bode, A., Mompeán, C., Irigoien,  
752 X., Olivar, M.P., Echevarría, F., de Puellas, M.F., González-Gordillo, J.I., 2020. Large  
753 deep-sea zooplankton biomass mirrors primary production in the global ocean. *Nature*  
754 *communications* 11, 1–8.
- 755 Hidalgo, P., Escribano, R., Fuentes, M., Jorquera, E., Vergara, O., 2012. How coastal  
756 upwelling influences spatial patterns of size-structured diversity of copepods off  
757 central-southern Chile (summer 2009). *Progress in Oceanography* 92, 134–145.
- 758 Hirche, H.-J., Mumm, N., 1992. Distribution of dominant copepods in the Nansen Basin,  
759 Arctic Ocean, in summer. *Deep Sea Research Part A. Oceanographic Research Papers*  
760 39, S485–S505.
- 761 Homma, T., Yamaguchi, A., 2010. Vertical changes in abundance, biomass and  
762 community structure of copepods down to 3000 m in the southern Bering Sea. *Deep*  
763 *Sea Research Part I: Oceanographic Research Papers* 57, 965–977.
- 764 Ibarbalz, F.M., Henry, N., Brandao, M.C., Martini, V., Busseni, G., Byrne, H., Coelho,  
765 L.P., Endo, H., Gasol, J.M., Gregory, A.C., Mahe, F., Rignonato, J., Royo-Llonch, M.,  
766 Salazar, G., Sanz-Saez, I., Scalco, E., Soviadan, D., Zayed, A.A., Zingone, A.,  
767 Labadie, K., Ferland, J., Marec, C., Kandels, S., Picheral, M., Dimier, C., Poulain, J.,  
768 Pisarev, S., Carmichael, M., Pesant, S., Acinas, S.G., Babin, M., Bork, P., Boss, E.,  
769 Bowler, C., Cochrane, G., de Vargas, C., Follows, M., Gorsky, G., Grimsley, N.,  
770 Guidi, L., Hingamp, P., Iudicone, D., Jaillon, O., Kandels, S., Karp-Boss, L., Karsenti,  
771 E., Not, F., Ogata, H., Pesant, S., Poulton, N., Raes, J., Sardet, C., Speich, S.,  
772 Stemann, L., Sullivan, M.B., Sunagawa, S., Wincker, P., Bopp, L., Lombard, F.,  
773 Zinger, L., Tara Oceans, C., 2019. Global Trends in Marine Plankton Diversity across  
774 Kingdoms of Life. *Cell* 179, 1084+. <https://doi.org/10.1016/j.cell.2019.10.008>
- 775 Irigoien, X., Klevjer, T.A., Røstad, A., Martinez, U., Boyra, G., Acuña, J.L., Bode, A.,  
776 Echevarria, F., Gonzalez-Gordillo, J.I., Hernandez-Leon, S., 2014. Large mesopelagic  
777 fishes biomass and trophic efficiency in the open ocean. *Nature communications* 5, 1–  
778 10.
- 779 Iversen, M.H., Lampitt, R.S., 2020. Size does not matter after all: no evidence for a size-  
780 sinking relationship for marine snow. *Progress in Oceanography* 189, 102445.
- 781 Karsenti, E., Acinas, S.G., Bork, P., Bowler, C., De Vargas, C., Raes, J., Sullivan, M.,  
782 Arendt, D., Benzoni, F., Claverie, J.M., Follows, M., Gorsky, G., Hingamp, P.,

- 783 Iudicone, D., Jaillon, O., Kandels-Lewis, S., Krzic, U., Not, F., Ogata, H., Pesant, S.,  
784 Reynaud, E.G., Sardet, C., Sieracki, M.E., Speich, S., Velayoudon, D., Weissenbach,  
785 J., Wincker, P., Tara Oceans, C., 2011. A Holistic Approach to Marine Eco-Systems  
786 Biology. *Plos Biology* 9. <https://doi.org/10.1371/journal.pbio.1001177>
- 787 Keister, J.E., Tuttle, L.B., 2013. Effects of bottom-layer hypoxia on spatial distributions  
788 and community structure of mesozooplankton in a sub-estuary of Puget Sound,  
789 Washington, USA. *Limnology and Oceanography* 58, 667–680.
- 790 Kiko, R., Biastoch, A., Brandt, P., Cravatte, S., Hauss, H., Hummels, R., Kriest, I., Marin,  
791 F., McDonnell, A.M.P., Oschlies, A., Picheral, M., Schwarzkopf, F.U., Thurnherr,  
792 A.M., Stemmann, L., 2017. Biological and physical influences on marine snowfall at  
793 the equator. *Nature Geoscience* 10, 852+. <https://doi.org/10.1038/ngeo3042>
- 794 Kiko, R., Brandt, P., Christiansen, S., Faustmann, J., Kriest, I., Rodrigues, E., Schütte, F.,  
795 Hauss, H., 2020. Zooplankton-mediated fluxes in the eastern tropical North Atlantic.  
796 *Frontiers in Marine Science* 1.
- 797 Kiko, R., Hauss, H., 2019. On the estimation of zooplankton-mediated active fluxes in  
798 oxygen minimum zone regions. *Frontiers in Marine Science* 6, 741.
- 799 Kjørboe, T., 2013. Zooplankton body composition. *Limnology and Oceanography* 58,  
800 1843–1850.
- 801 Kjørboe, T., 2011. What makes pelagic copepods so successful? *Journal of Plankton*  
802 *Research* 33, 677–685.
- 803 Kjørboe, T., Visser, A., Andersen, K.H., Handling editor: Howard Browman, 2018. A  
804 trait-based approach to ocean ecology. *ICES Journal of Marine Science*.  
805 <https://doi.org/10.1093/icesjms/fsy090>
- 806 Koppelman, R., Weikert, H., Halsband-Lenk, C., Jennerjahn, T., 2004.  
807 Mesozooplankton community respiration and its relation to particle flux in the  
808 oligotrophic eastern Mediterranean. *Global Biogeochemical Cycles* 18.
- 809 Koppelman, R., Zimmermann-Timm, H., Weikert, H., 2005. Bacterial and zooplankton  
810 distribution in deep waters of the Arabian Sea. *Deep-Sea Research Part I-*  
811 *Oceanographic Research Papers* 52, 2184–2192.  
812 <https://doi.org/10.1016/j.dsr.2005.06.012>
- 813 Kosobokova, K.N., Hopcroft, R.R., 2010. Diversity and vertical distribution of  
814 mesozooplankton in the Arctic's Canada Basin. *Deep Sea Research Part II: Topical*  
815 *Studies in Oceanography* 57, 96–110.
- 816 Kwiatkowski, L., Aumont, O., Bopp, L., 2019. Consistent trophic amplification of marine  
817 biomass declines under climate change. *Global change biology* 25, 218–229.
- 818 Lampitt, R.S., Noji, T., Von Bodungen, B., 1990. What happens to zooplankton fecal  
819 pellets? Implication for material flux. *Marine Biology* 104, 15–23.
- 820 Laws, R.M., 1985. The ecology of the Southern Ocean. *Amer. Scient.* 73, 26–40.
- 821 Legendre, P., Legendre, L., 1998. Numerical ecology, 2nd english. ed, *Developments in*  
822 *environmental modelling* 20. Elsevier, Amsterdam.
- 823 Lehette, P., Hernandez-Leon, S., 2009. Zooplankton biomass estimation from digitized  
824 images: a comparison between subtropical and Antarctic organisms. *Limnology and*  
825 *Oceanography-Methods* 7, 304–308.
- 826 Madhupratap, M., Nair, K.N.V., Venugopal, P., Gauns, M., Haridas, P., Gopalakrishnan,  
827 T., Nair, K.K.C., 2004. Arabian Sea oceanography and fisheries.
- 828 Marsay, C.M., Sanders, R.J., Henson, S.A., Pabortsava, K., Achterberg, E.P., Lampitt,  
829 R.S., 2015. Attenuation of sinking particulate organic carbon flux through the  
830 mesopelagic ocean. *Proceedings of the National Academy of Sciences* 112, 1089–  
831 1094.
- 832 Martin, J.H., Knauer, G.A., Karl, D.M., Broenkow, W.W., 1987. VERTEX: Carbon

- 833 cycling in the Northeast Pacific. *Deep-Sea Research* 34, 267–285.
- 834 Morrison, J.M., Codispoti, L., Smith, S.L., Wishner, K., Flagg, C., Gardner, W.D.,  
835 Gaurin, S., Naqvi, S., Manghnani, V., Prosperie, L., 1999. The oxygen minimum zone  
836 in the Arabian Sea during 1995. *Deep Sea Research Part II: Topical Studies in*  
837 *Oceanography* 46, 1903–1931.
- 838 MOTODA, S., 1959. Devices of simple plankton apparatus. *Memoirs of the faculty of*  
839 *fisheries Hokkaido University* 7, 73–94.
- 840 Ohman, M.D., Romagnan, J.B., 2016. Nonlinear effects of body size and optical  
841 attenuation on Diel Vertical Migration by zooplankton. *Limnology and Oceanography*  
842 61, 765–770. <https://doi.org/10.1002/lno.10251>
- 843 Oschlies, A., Brandt, P., Stramma, L., Schmidtko, S., 2018. Drivers and mechanisms of  
844 ocean deoxygenation. *Nature Geoscience* 11, 467–473.
- 845 Paffenhofer, G.A., Mazzocchi, M.G., 2003. Vertical distribution of subtropical  
846 epipelagic copepods. *Journal of Plankton Research* 25, 1139–1156.
- 847 Palomares-García, R.J., Gómez-Gutiérrez, J., Robinson, C.J., 2013. Winter and summer  
848 vertical distribution of epipelagic copepods in the Gulf of California. *Journal of*  
849 *Plankton Research* 35, 1009–1026.
- 850 Park, C., Wormuth, J., 1993. Distribution of Antarctic zooplankton around Elephant  
851 Island during the austral summers of 1988, 1989, and 1990. *Polar Biology* 13, 215–  
852 225.
- 853 Parris, D.J., Ganesh, S., Edgcomb, V.P., DeLong, E.F., Stewart, F.J., 2014. Microbial  
854 eukaryote diversity in the marine oxygen minimum zone off northern Chile. *Frontiers*  
855 *in microbiology* 5, 543.
- 856 Pesant, S., Not, F., Picheral, M., Kandels-Lewis, S., Le Bescot, N., Gorsky, G., Iudicone,  
857 D., Karsenti, E., Speich, S., Trouble, R., Dimier, C., Searson, S., Tara Oceans  
858 Consortium, C., 2015. Open science resources for the discovery and analysis of Tara  
859 Oceans data. *Scientific data* 2, 150023–150023. <https://doi.org/10.1038/sdata.2015.23>
- 860 Quetin, L.B., Ross, R.M., Frazer, T.K., Haberman, K.L., 1996. Factors affecting  
861 distribution and abundance of zooplankton, with an emphasis on Antarctic krill,  
862 *Euphausia superba*. *Antarctic Research Series* 70, 357–371.
- 863 Remsen, A., Hopkins, T.L., Samson, S., 2004. What you see is not what you catch: a  
864 comparison of concurrently collected net, Optical Plankton Counter, and Shadowed  
865 Image Particle Profiling Evaluation Recorder data from the northeast Gulf of Mexico.  
866 *Deep-Sea Research Part I-Oceanographic Research Papers* 51, 129–151.
- 867 Richardson, A.J., 2008. In hot water: zooplankton and climate change. *ICES Journal of*  
868 *Marine Science* 65, 279–295. <https://doi.org/10.1093/icesjms/fsn028>
- 869 Robinson, C., Steinberg, D.K., Anderson, T.R., Aristegui, J., Carlson, C.A., Frost, J.R.,  
870 Ghiglione, J.F., Hernandez-Leon, S., Jackson, G.A., Koppelman, R., Queguiner, B.,  
871 Ragueneau, O., Rassoulzadegan, F., Robison, B.H., Tamburini, C., Tanaka, T.,  
872 Wishner, K.F., Zhang, J., 2010. Mesopelagic zone ecology and biogeochemistry - a  
873 synthesis. *Deep-Sea Research Part II-Topical Studies in Oceanography* 57, 1504–  
874 1518. <https://doi.org/10.1016/j.dsr2.2010.02.018>
- 875 Roe, H., 1988. Midwater biomass profiles over the Madeira Abyssal Plain and the  
876 contribution of copepods, in: *Biology of Copepods*. Springer, pp. 169–181.
- 877 Rombouts, I., Beaugrand, G., Ibanez, F., Gasparini, S., Chiba, S., Legendre, L., 2010. A  
878 multivariate approach to large-scale variation in marine planktonic copepod diversity  
879 and its environmental correlates. *Limnology and Oceanography* 55, 2219–2229.  
880 <https://doi.org/10.4319/lno.2010.55.5.2219>
- 881 Ross, R.M., Quetin, L.B., Martinson, D.G., Iannuzzi, R.A., Stammerjohn, S.E., Smith,  
882 R.C., 2008. Palmer LTER: Patterns of distribution of five dominant zooplankton

- 883 species in the epipelagic zone west of the Antarctic Peninsula, 1993–2004. *Deep Sea*  
884 *Research Part II: Topical Studies in Oceanography* 55, 2086–2105.
- 885 Roullier, F., Berline, L., Guidi, L., De Madron, X.D., Picheral, M., Sciandra, A., Pesant,  
886 S., Stemmann, L., 2014. Particle size distribution and estimated carbon flux across the  
887 Arabian Sea oxygen minimum zone. *Biogeosciences* 11, 4541–4557.  
888 <https://doi.org/10.5194/bg-11-4541-2014>
- 889 Rutherford, S., D’Hondt, S., Prell, W., 1999. Environmental controls on the geographic  
890 distribution of zooplankton diversity. *Nature* 400, 749–753.  
891 <https://doi.org/10.1038/23449>
- 892 Saporiti, F., Bearhop, S., Vales, D.G., Silva, L., Zenteno, L., Tavares, M., Crespo, E.A.,  
893 Cardona, L., 2015. Latitudinal changes in the structure of marine food webs in the  
894 Southwestern Atlantic Ocean. *Marine Ecology Progress Series* 538, 23–34.
- 895 Sarah L. C. Giering, Richard Sanders, Richard S. Lampitt, Thomas R. Anderson,  
896 Christian Tamburini, Mehdi Boutrif, Mikhail V. Zubkov, Chris M. Marsay, Stephanie  
897 A. Henson, Kevin Saw, Kathryn Cook, Daniel J. Mayor, 2014. Reconciliation of the  
898 carbon budget in the ocean’s twilight zone. *Nature* 507, 17.  
899 <https://doi.org/10.1038/nature13123>
- 900 Schmidtko, S., Stramma, L., Visbeck, M., 2017. Decline in global oceanic oxygen content  
901 during the past five decades. *Nature* 542, 335–339.
- 902 Seibel, B.A., 2011. Critical oxygen levels and metabolic suppression in oceanic oxygen  
903 minimum zones. *Journal of Experimental Biology* 214, 326–336.
- 904 Smith, S., Roman, M., Prusova, I., Wishner, K., Gowing, M., Codispoti, L.A., Barber, R.,  
905 Marra, J., Flagg, C., 1998. Seasonal response of zooplankton to monsoonal reversals  
906 in the Arabian Sea. *Deep-Sea Research Part II* 45, 2369–2403.
- 907 St John, M.A., Borja, A., Chust, G., Heath, M., Grigorov, I., Mariani, P., Martin, A.P.,  
908 Santos, R.S., 2016. A dark hole in our understanding of marine ecosystems and their  
909 services: perspectives from the mesopelagic community. *Frontiers in Marine Science*  
910 3, 31.
- 911 Steinberg, D.K., Landry, M.R., 2017. Zooplankton and the ocean carbon cycle. *Annual*  
912 *review of marine science* 9, 413–444.
- 913 Stemmann, L., Jackson, G.A., Gorsky, G., 2004. A vertical model of particle size  
914 distributions and fluxes in the midwater column that includes biological and physical  
915 processes - Part II: application to a three year survey in the NW Mediterranean Sea.  
916 *Deep-Sea Research Part I-Oceanographic Research Papers* 51, 885–908.  
917 <https://doi.org/10.1016/j.dsr.2004.03.002>
- 918 Stempniewicz, L., Błachowiak-Samołyk, K., Węśławski, J.M., 2007. Impact of climate  
919 change on zooplankton communities, seabird populations and arctic terrestrial  
920 ecosystem—a scenario. *Deep Sea Research Part II: Topical Studies in Oceanography*  
921 54, 2934–2945.
- 922 Stramma, L., Schmidtko, S., Levin, L.A., Johnson, G.C., 2010. Ocean oxygen minima  
923 expansions and their biological impacts. *Deep Sea Research Part I: Oceanographic*  
924 *Research Papers* 57, 587–595. <https://doi.org/10.1016/j.dsr.2010.01.005>
- 925 Stukel, M.R., Ohman, M.D., Kelly, T.B., Biard, T., 2019. The roles of suspension-feeding  
926 and flux-feeding zooplankton as gatekeepers of particle flux into the mesopelagic  
927 ocean in the Northeast Pacific. *Frontiers in Marine Science* 6, 397.
- 928 Tarling, G.A., Shreeve, R.S., Ward, P., Atkinson, A., Hirst, A.G., 2004. Life-cycle  
929 phenotypic composition and mortality of *Calanoides acutus* (Copepoda : Calanoida) in  
930 the Scotia Sea: a modelling approach. *Marine Ecology-Progress Series* 272, 165–181.
- 931 Terazaki, M., Wada, M., 1988. Occurrence of large numbers of carcasses of the large,  
932 grazing copepod *Calanus cristatus* from the Japan Sea. *Marine Biology* 97, 177–183.



- 933 Trudnowska, E., Lacour, L., Ardyna, M., Rogge, A., Irisson, J.O., Waite, A.M., Babin,  
934 M., Stemann, L., 2021. Marine snow morphology illuminates the evolution of  
935 phytoplankton blooms and determines their subsequent vertical export. *Nature*  
936 *communications* 12, 2816–2816. <https://doi.org/10.1038/s41467-021-22994-4>  
937 Tutasi, P., Escribano, R., 2020. Zooplankton diel vertical migration and downward C flux  
938 into the oxygen minimum zone in the highly productive upwelling region off northern  
939 Chile. *Biogeosciences* 17, 455–473.
- 940 Uitz, J., Claustre, H., Morel, A., Hooker, S.B., 2006. Vertical distribution of  
941 phytoplankton communities in open ocean: An assessment based on surface  
942 chlorophyll. *Journal of Geophysical Research. C. Oceans* 111,  
943 [doi:10.1029/2005JC003207].
- 944 Van Mooy, B.A., Keil, R.G., Devol, A.H., 2002. Impact of suboxia on sinking particulate  
945 organic carbon: Enhanced carbon flux and preferential degradation of amino acids via  
946 denitrification. *Geochimica et Cosmochimica Acta* 66, 457–465.
- 947 Vaquer-Sunyer, R., Duarte, C.M., 2008. Thresholds of hypoxia for marine biodiversity.  
948 *Proceedings of the National Academy of Sciences* 105, 15452–15457.
- 949 Werner, T., Buchholz, F., 2013. Diel vertical migration behaviour in Euphausiids of the  
950 northern Benguela current: seasonal adaptations to food availability and strong  
951 gradients of temperature and oxygen. *Journal of Plankton Research* 35, 792–812.
- 952 Wheeler Jr, E., 1967. Copepod detritus in the deep sea. *Limnology and Oceanography*  
953 12, 697–702.
- 954 Wishner, K.F., Ashjian, C.J., Gelfman, C., Gowing, M.M., Kann, L., Levin, L.A.,  
955 Mullineaux, L.S., Saltzman, J., 1995. Pelagic and Benthic Ecology of the Lower  
956 Interface of the Eastern Tropical Pacific Oxygen Minimum Zone. *Deep Sea Res.* 42,  
957 93–115.
- 958 Wishner, K.F., Gelfman, C., Gowing, M.M., Outram, D.M., Rapien, M., Williams, R.L.,  
959 2008. Vertical zonation and distributions of calanoid copepods through the lower  
960 oxycline of the Arabian Sea oxygen minimum zone. *Prog. Oceanogr.* 78, 163–191.  
961 <https://doi.org/10.1016/j.pocean.2008.03.001>
- 962 Wishner, K.F., Seibel, B., Outram, D., 2020. Ocean deoxygenation and copepods: coping  
963 with oxygen minimum zone variability. *Biogeosciences* 17, 2315–2339.
- 964 Wishner, K.F., Seibel, B.A., Roman, C., Deutsch, C., Outram, D., Shaw, C.T., Birk, M.A.,  
965 Mislan, K., Adams, T., Moore, D., 2018. Ocean deoxygenation and zooplankton: very  
966 small oxygen differences matter. *Science advances* 4, eaau5180.
- 967 Yamaguchi, A., Watanabe, Y., Ishida, H., Harimoto, T., Furusawa, K., Suzuki, S.,  
968 Ishizaka, J., Ikeda, T., Mac Takahashi, M., 2004. Latitudinal differences in the  
969 planktonic biomass and community structure down to the greater depths in the western  
970 North Pacific. *Journal of Oceanography* 60, 773–787.
- 971 Yamaguchi, A., Watanabe, Y., Ishida, H., Harimoto, T., Furusawa, K., Suzuki, S.,  
972 Ishizaka, J., Ikeda, T., Takahashi, M., 2002. Community and trophic structures  
973 of pelagic copepods down to greater depths in the western subarctic Pacific (WEST-  
974 COSMIC). *Deep Sea Research Part I* 49, 1007–1025.
- 975 Yasuhara, M., Hunt, G., Dowsett, H.J., Robinson, M.M., Stoll, D.K., 2012. Latitudinal  
976 species diversity gradient of marine zooplankton for the last three million years.  
977 *Ecology Letters* 15, 1174–1179. <https://doi.org/10.1111/j.1461-0248.2012.01828.x>  
978

979

980

981

982



983

984 Table 1: List of the 19 taxa kept for the RDA analysis.

| <b>Taxonomic groups</b> | <b>Sub groups</b>                                                         |
|-------------------------|---------------------------------------------------------------------------|
| Protista                | Protista includes unrecognized protista on the images                     |
| Annelida                | Images of all Annelida                                                    |
| Chaetognatha            | Images of all Chaetognatha                                                |
| Tunicata                | Images of all Gelatinous filter feeders                                   |
| Cnidaria                | Images of all gelatinous carnivores belonging to Cnidaria                 |
| Mollusca                | Images of all Pteropoda                                                   |
| Cladocera               | Images of all Small Cladocera                                             |
| Eumalacostraca          | Images of all Decapoda but those distinguish at detailed taxonomic level  |
| Euphausiacea            | Images of all Euphausiacea                                                |
| Amphipoda               | Images of all Amphipoda                                                   |
| Ostracoda               | Images of all Ostracoda                                                   |
| Crustacean_larvae       | Images of all crustacean larvae                                           |
| Other_Copepoda          | Images of all Copepoda but those distinguish at detailed taxonomic level  |
| Calanoida               | Images of all Calanoida but those distinguish at detailed taxonomic level |
| Oithonidae              | Images of all Oithonidae                                                  |
| Corycaeidae             | Images of all Corycaeidae                                                 |
| Oncaeidae               | Images of all Oncaeidae                                                   |
| Metridinidae            | Images of all Metridinidae                                                |
| Calanidae               | Images of all Calanidae                                                   |

985

986 Table 2: Coefficient factors used for equation 1 and that were taken from observed allometric  
 987 relationships between body area and individual dry mass ( Lehette et al., 2009). The conversion factors  
 988 to carbon are taken from Kiorboe 2013.

| <b>Zooplankton category</b>                  | <b>Biomass Exponent (b)</b> | <b>Biomass Multiplier (a)</b> | <b>DW to C</b> |
|----------------------------------------------|-----------------------------|-------------------------------|----------------|
| Copepods                                     | 1.59 ± 0.03                 | 45.25                         | 0.48           |
| Chaetognaths                                 | 1.19 ± 0.13                 | 23.45                         | 0.367          |
| Decapods                                     | 1.48 ± 0.05                 | 49.58                         | 0.419          |
| Cnidaria                                     | 1.02 ± 0.38                 | 43.17                         | 0.132          |
| Tunicata                                     | 1.24 ± 0.08                 | 4.03                          | 0.103          |
| Pteropods                                    | 1.54 ± 0.03                 | 43.38                         | 0.289          |
| Protists*                                    |                             | 0.08 mgC mm <sup>-3</sup>     |                |
| Other<br>(Annelids, Cladocera,<br>Ostracoda) | 1.54 ± 0.03                 | 43.38                         | 0.289          |

989 \* for the protist we used a conversion factor between biovolume and biomass (Biard et al.,  
 990 2016)

991

992  
993

Table 3: Summary of the main mesozooplankton groups global proportion of abundance and biomass:

| Taxa<br>Proportion(%)                        | Epipelagic |         | Upper Mesopelagic |         | Lower Mesopelagic |         |
|----------------------------------------------|------------|---------|-------------------|---------|-------------------|---------|
|                                              | Abundance  | Biomass | Abundance         | Biomass | Abundance         | Biomass |
| All copepoda                                 | 84.89      | 65      | 84.80             | 76.39   | 94.5              | 96.5    |
| Chaetognatha                                 | 3.67       | 8.39    | 2.44              | 3.48    | 2.06              | 2.53    |
| Crust decapoda                               | 2.9        | 18.9    | 0.36              | 14.98   | 0.00              | 0.00    |
| Cnidaria                                     | 0.7        | 0.96    | 0.19              | 0.24    | 0.00              | 0.00    |
| Tunicata                                     | 0.5        | 0.02    | 0.08              | 0.001   | 0.1               | 0.00    |
| Protista                                     | 1.5        | 0.5     | 0.97              | 0.19    | 0.9               | 0.09    |
| Pteropoda                                    | 1.2        | 0.6     | 0.41              | 0.03    | 0.00              | 0.00    |
| Other<br>(annelids, cladocera,<br>ostracoda) | 4.2        | 3.09    | 10.05             | 3.23    | 2.38              | 0.87    |
|                                              |            |         |                   |         |                   |         |

994  
995  
996  
997

Table 4: Summary of the vertical attenuation rate (b: median and IC: confidence Interval) of mesozooplankton abundance and biomass and particle vertical flux (b: median value and IC: confidence Interval).

|               | Zooplankton abundance<br>( $Ind. m^{-3}$ ) |               | Zooplankton biomass<br>( $mgC. m^{-3}$ ) |               | Particle vertical flux |              |
|---------------|--------------------------------------------|---------------|------------------------------------------|---------------|------------------------|--------------|
|               | b                                          | IC (95%)      | b                                        | IC (95%)      | b                      | IC (95%)     |
| ANOXIA_TROPIC | -1.82                                      | -2.13 - -1.13 | -1.3                                     | -2.9 - -0.75  | -0.26                  | -0.77- -0.19 |
| TROPIC        | -1.39                                      | -2.46 - -0.69 | -1.04                                    | -1.92 - -0.58 | -0.42                  | -0.78- -0.21 |
| TEMPERATE     | -1.19                                      | -1.56 - -0.64 | -0.89                                    | -1.26 - -0.57 | -0.50                  | -0.84- -0.11 |
| POLAR         | -1.18                                      | -1.71 - -0.96 | -0.83                                    | -1.41 - -0.74 | -0.78                  | -4.51- -0.36 |

998  
999  
1000  
1001

Table 5: Probability of H0, no difference between the groups (pairwise Kruskal-Wallis test) for total zooplankton and biomass depth attenuation rates and particle flux attenuation rate. \* Significant differences.

| Two by two comparisons |           | Abundance | Biomass | Flux |
|------------------------|-----------|-----------|---------|------|
| Tropic-Anoxia          | Tropic    | 0.057     | 0.641   | 0.77 |
| Tropic-Anoxia          | Temperate | 0.0018*   | 0.189   | 0.82 |
| Tropic-Anoxia          | Polar     | 0.01*     | 0.238   | 0.09 |
| Tropic                 | Temperate | 0.34      | 0.639   | 0.99 |
| Tropic                 | Polar     | 0.51      | 0.685   | 0.28 |
| Temperate              | Polar     | 0.99      | 1       | 0.52 |

1002

1003 [Supplementary material](#)

1004

1005 [Availability of the dataset](#)

1006 **Data sets for the environment are available at Pangea:**

1007 (<https://doi.org/10.1594/PANGAEA.840721>)

1008

1009 **Tables for the RDA are available**

1010 For zooplankton: Metadata\_Zooplankton\_Article\_RDA.xls

1011

1012

1013 **Zooplankton Pangea for the tables/ecotaxa for the vignettes**

1014 <https://ecotaxa.obs->

1015 [vlfr.fr/prj/714?taxo=56693&taxochild=N&ipp=100&zoom=100&sortby=&magenab](https://ecotaxa.obs-vlfr.fr/prj/714?taxo=56693&taxochild=N&ipp=100&zoom=100&sortby=&magenab)

1016 [bled=0&popupenabled=0&statusfilter=&samples=&instrum=&sortorder=asc&disp](https://ecotaxa.obs-vlfr.fr/prj/714?taxo=56693&taxochild=N&ipp=100&zoom=100&sortby=&magenab)

1017 [field=&projid=714&pageoffset=0](https://ecotaxa.obs-vlfr.fr/prj/714?taxo=56693&taxochild=N&ipp=100&zoom=100&sortby=&magenab)

1018

1019

1020 [Quality of the dataset](#)

1021 The analysis reported here is the first to apply consistent imaging techniques in order to  
1022 investigate particle flux, zooplankton community composition and biomass across the global  
1023 ocean. To do so, our study relies on the combined use of the Underwater Video Profiler v5  
1024 (UVP5), a Multinet and the Zooscan imaging system. These results are the first combined global  
1025 zooplankton and flux estimates and as such provide a baseline for future studies. Their quality  
1026 needs to be discussed with regards to 1) flux assessment, 2) mesh selectivity, mass conversion  
1027 and possible impact of dead zooplankton in the images, the capacity of the sampling design to  
1028 capture or not 3) day night variability and 4) mesopelagic peaks of zooplankton.

1029 Vertical particle mass fluxes ( $\text{mg Dry Weight m}^{-2}\text{d}^{-1}$ ) were calculated from the particle  
1030 size spectra (150  $\mu\text{m}$  -1.5 mm) detected by the UVP5 following Guidi et al., (2008). Briefly,  
1031 the procedure optimized two parameters in the flux equation by comparing UVP5 derived flux  
1032 and a global sediment trap flux data set (Guidi et al., 2008). Depending on the ocean basin,  
1033 regional algorithms with different sets of the two parameters have been proposed (Forest et al.,  
1034 2013; Kiko et al., 2017) but the shape of the allometric relationships between particle size and  
1035 flux is kept as a growing monotonic power relationship. Many studies have shown that this  
1036 assumption is verified when comparing extremes size of particles but they all have also shown

1037 a high variability (Guidi et al., 2008; Iversen and Lampitt, 2020) which cannot be depicted  
1038 without more information on the type of particles. In addition, we used the same parametrization  
1039 for each depth layer although a few observational and modelling studies (Berelson, 2002;  
1040 Gehlen et al., 2006) have proposed that the sinking speed may vary with depth. Finally, the  
1041 fluxes are calculated considering all particles detected in situ by the UVP5. Because particles  
1042 are so abundant in the size range presently considered for flux estimation (150 $\mu$ m to 1.5mm),  
1043 the impact of zooplankton in the present flux estimates is low (Guidi et al., 2015; Kiko et al.,  
1044 2020). We did not perform further sensitivity analyses as the aim of this study was not to  
1045 quantify absolute carbon flux but to assess correlations with zooplankton and other  
1046 environmental variables. In the future, better recognition of particles on images will possibly  
1047 allow to calculate different particle speed for different types of aggregates as was proposed  
1048 recently (Trudnowska et al., 2021).

1049 Zooplankton abundance estimates are sensitive to the mesh of the plankton net tow used  
1050 (Gallienne et al., 2001). A mesh size of 300 $\mu$ m was selected for the Multinet as a good  
1051 compromise to capture both mesozooplankton and macro-zooplankton. However, the small  
1052 copepod families (Oithona, Oncaeidae, Clausocalanidae, Paracalanidae) that dominate  
1053 community composition in tropical/subtropical open oceans are not collected in an optimal  
1054 fashion with the present mesh size, contrary to the larger Calanidae notably in the temperate  
1055 and polar regions. Therefore, our abundance estimates likely underestimate the contribution of  
1056 the smallest mesozooplankton groups. Nonetheless, even a net equipped with a 150  $\mu$ m mesh  
1057 can still underestimate the abundance of cyclopoids and early copepod stages (Paffenhofer and  
1058 Mazzocchi, 2003).

1059 Nets can also destroy fragile organisms during the sampling process (Remsen et al.,  
1060 2004). For example, the very low abundance and biomass of Rhizarians reported here  
1061 contrasting with recent findings based on *in situ* cameras (Biard et al., 2016). This is likely due  
1062 to such sampling biases. As for the estimation of particle fluxes from particle size spectra, we  
1063 assessed the carbon biomass of each individual organism's size using published allometric  
1064 relationships (Lehette and Hernández-León, 2009) in which large and rare organisms  
1065 contributes importantly to the total biomass bringing strong variability in the results. To account  
1066 for the excessive variability in biomass estimates, we analysed our results using both abundance  
1067 and biomass.

1068 Dead zooplankton, including carcasses, are increasingly recognized as being quite  
1069 abundant in the mesopelagic water (Böttger-Schnack, 1996; Roe, 1988; Terazaki and Wada,  
1070 1988; Wheeler Jr, 1967). It is impossible to assess whether the damages of the organisms

1071 observed on the digitized organisms were inflicted by the net tow. This is even harder to assess  
1072 in the deeper nets which spent more time in the water column. Therefore, we cannot tell whether  
1073 the organisms were damaged during the sampling process or dead beforehand. We attempted  
1074 to separate the carcasses from the complete bodies of copepods based on grey intensity criteria  
1075 or by looking at the physical integrity of the organisms, but this was not successful because of  
1076 independent and continuous changes for both criteria. Nonetheless, among the 110'000  
1077 vignettes of copepods, 21'117 (20%) were initially classified as possible carcasses. Their  
1078 proportion was equal to 42.90% in the surface layer, 26.71% in the upper mesopelagic and  
1079 30.39% in the deepest layers. The median and interquartile of abundances varied from the  
1080 surface (median = 1.21 *Ind/m*<sup>3</sup>, IQR = 2.53) to the upper mesopelagic (median = 0.75, IQR =  
1081 0.89) and increased towards deeper layers (median = 0.85, IQR = 0.99). Subsequent data  
1082 analyses showed that aggregating them or not with the non-damaged copepods had no effect on  
1083 the analysis' results because their proportion was homogeneous across sampling sites.  
1084 Therefore, all copepods were ultimately pooled together for all our numerical analyses.

1085 Zooplankton and micronekton perform diel vertical migration (DVM) in all oceans  
1086 (Banse, 1964). Depending on the organism's taxonomic group and size, ranges of diel migration  
1087 show tremendous variability (Ohman and Romagnan, 2016; Tarling et al., 2004). In our study,  
1088 significant differences in abundances between day and night samples was found for a few  
1089 groups known to be diel migrators (Euphausiids, Metridinidae, Corycaeidae, Cnidaria for  
1090 abundance data; and Eumalacostraca and Ostracoda for biomass data). However, at the  
1091 community level (i.e., total mesozooplankton), no significant differences could be found  
1092 between the day and night samples at surface. However, total zooplankton biomass was higher  
1093 in night samples compared to day samples, because of the more abundant large-bodied  
1094 migrators (Eumalacostraca, Euphausiacea, Table S2). For abundance, this is a rather  
1095 unexpected result as a large number of zooplankton taxa perform DVM (Kjørboe et al., 2018;  
1096 Ohman and Romagnan, 2016). Yet, this absence of significant changes had already been  
1097 observed in previous studies using similar types of plankton nets (Wishner et al., 2018). DVM  
1098 could not be detected from the ANOSIM analysis of the surface layer for different reasons.  
1099 First, the weak diel differences in abundances could easily be smeared by plankton patchiness  
1100 when the replicates are too low. Second, it is possible that no differences were observed because  
1101 the large organisms carrying out DVM are too few in number compared to the smaller ones in  
1102 the present data. Day and night differences between the slopes of the total biomass were found,  
1103 probably due to the few diel migrators species. Hence, it is well known that large zooplankton  
1104 (euphausiids, sergestid shrimps, amphipods, fish such as myctophids(Morrison et al., 1999))

1105 sampled with larger Multinet nets (opening  $>1\text{m}^2$  and mesh size  $>500\mu\text{m}$ ), or detected through  
1106 acoustics techniques, showed stronger DVM than smaller organisms collected through smaller  
1107 Multinet nets such as ours (opening of  $0.25\text{m}^2$  and mesh size of  $300\mu\text{m}$ ). Furthermore,  
1108 copepods contributed to nearly 80% of total zooplankton abundance in our samples, and  
1109 copepod DVM may be confined most typically to populations living within the epipelagic zone  
1110 (Madhupratap et al., 2004; Morrison et al., 1999; Smith et al., 1998).

1111 Many studies have reported midwater peaks of zooplankton and nekton in 100-200 m  
1112 depth layers centered around 40 to 600 m depth (Andersen et al., 1998; Irigoien et al., 2014;  
1113 Koppelman et al., 2004) indicating that the use of a simple power law to describe plankton  
1114 biomass may be an oversimplification of the true vertical zonation. The general lack of such  
1115 peaks may be explained by the variability in methods used between studies. Midwater peaks  
1116 are often reported with instruments allowing a good vertical resolution ( $> 10$  observations in  
1117 the upper kilometer) and targeting the large migrating organisms with nets having large mesh  
1118 size or acoustic devices with frequencies adapted to nektonic organisms. Many studies using  
1119 Multinets equipped with rather fine mesh size ( $<500\mu\text{m}$ ) do not capture such peaks in  
1120 abundance/ biomass (Homma and Yamaguchi, 2010; Yamaguchi et al., 2002). In our study, the  
1121 mesopelagic layer was sampled down to 900 m depth, and only with 2 or 3 nets with a mesh  
1122 size of  $300\mu\text{m}$  and a small net opening ( $0.25\text{m}^2$ ). Therefore, midwater peaks could have been  
1123 smoothed in the few layers. Hence, the power law simplification may be a proper proxy for the  
1124 smaller fraction of the mesozooplankton (mainly copepods smaller than 2 mm).

1125  
1126  
1127



1128 **Community vertical distribution**

1129 On a global scale, zooplankton average abundance and biomass decreased drastically  
1130 with depth, with quasi similar patterns for the eight main zooplankton groups (Fig. S1). The  
1131 strongest variation in abundance was observed for copepods, followed by chaetognaths, small  
1132 omnivorous zooplankton and crustacean decapods (Fig. S1). The strongest variation in biomass  
1133 with depth were observed for copepods followed by decapods, chaetognaths and small  
1134 omnivorous zooplankton (Fig. S2).

1135

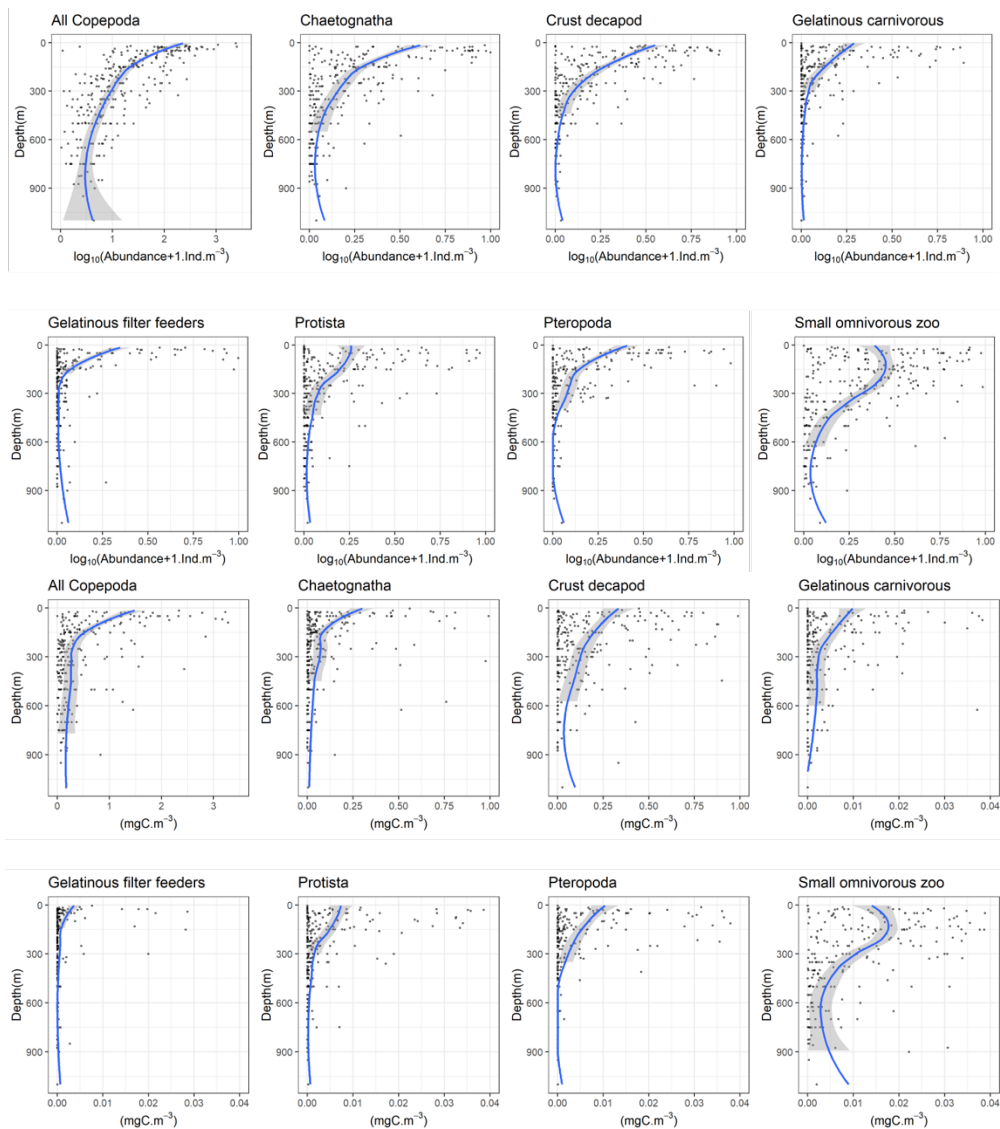

1136

1137

1138

1139 **Fig. S1: Vertical profiles of abundance (two first lines) and biomass (two last lines) in the global ocean**  
1140 **for the 8 functional mesozooplankton groups: all copepoda, chaetognatha, crustacean decapoda (crust**  
1141 **decapod), gelatinous carnivorous, gelatinous filter feeders, protista, pteropoda, small omnivorous**  
1142 **zooplankton. Not all abundance and biomass scales are similar to better observe the gradients. In all**

1143 cases, solid lines correspond to a smooth trends and gray ribbons to the 95% confidence intervals. These  
1144 trends are drawn for illustrative purposes and were not used in down- stream analyses.

1145

### 1146 **Community composition in the upper first kilometer of the ocean**

1147 When analyzing all vertical layers together, the redundant discriminant analysis (RDA)  
1148 indicated that environmental variables explained 27.01% of the variance in mesozooplankton  
1149 groups abundance (Fig. 4). The first RDA axis (RDA1; 47.08% of the variance constrained by  
1150 the RDA) opposed the samples from polar waters (Arctic Ocean, Southern Ocean;  $RDA1 > 0$ )  
1151 to the samples taken at lower latitudes (Indian Ocean, Northern and Southern Atlantic Ocean,  
1152 Northern and Southern Pacific Ocean;  $RDA1 < 0$ ), especially for epipelagic and upper  
1153 mesopelagic samples. RDA1 was negatively scored by variables depicting a gradient of tropical  
1154 to extratropical conditions: temperature, salinity, and the relative contribution of  
1155 picophytoplankton and nanophytoplankton to phytoplankton community biomass. Meanwhile,  
1156 RDA1 was positively scored by dissolved oxygen concentration, the intensity of the vertical  
1157 particle flux and its attenuation rate, the concentration of suspended particles and the  
1158 contribution of microphytoplankton to total phytoplankton biomass. The second RDA axis  
1159 (22.22 % of the constrained variance) opposed the samples from the surface ( $RDA2 < 0$ ) to the  
1160 samples from mesopelagic layers ( $RDA2 > 0$ ). This axis was positively scored by depth,  
1161 salinity, and nitrate concentrations, and negatively scored by pico-, nano- and  
1162 microphytoplankton concentrations, oxygen concentration, particles and chlorophyll *a*  
1163 concentrations. Samples from the epipelagic layer of higher latitudes showed higher plankton  
1164 abundances and were dominated by Calanidae and crustacean larvae (copepod nauplii).  
1165 Samples from the epipelagic layers of lower latitudes Tropical Ocean were more diverse as they  
1166 displayed more even contributions of Protista, Eumalacostraca, Annelida, Amphipoda,  
1167 Tunicata, Corycaeidae, Chaetognatha, Euphausiacea, Oithonidae, Cnidaria, Mollusca and  
1168 Cladocera. In the mesopelagic layer, communities were less spread in the RDA space than for  
1169 the surface layer. Mesopelagic communities were dominated by Other Copepoda and  
1170 Metridinidae at higher latitudes and by Calanoida, Ostracoda and Oncaeidae at lower latitudes.  
1171 Polar and temperate waters displayed lower mesozooplankton diversity but higher  
1172 mesozooplankton abundances/biomass, more intense vertical particle fluxes, and stronger  
1173 particle attenuation rates. On the opposite, the warmer and more oligotrophic tropical waters  
1174 displayed lower diversity, lower mesozooplankton biomass/ abundance, but higher attenuation  
1175 rates of mesozooplankton organisms. To better disentangle the relationships between

1176 mesozooplankton composition and the environmental conditions within the different vertical  
 1177 layers of the ocean, separate RDAs were then performed for each depth layer.

1178

1179

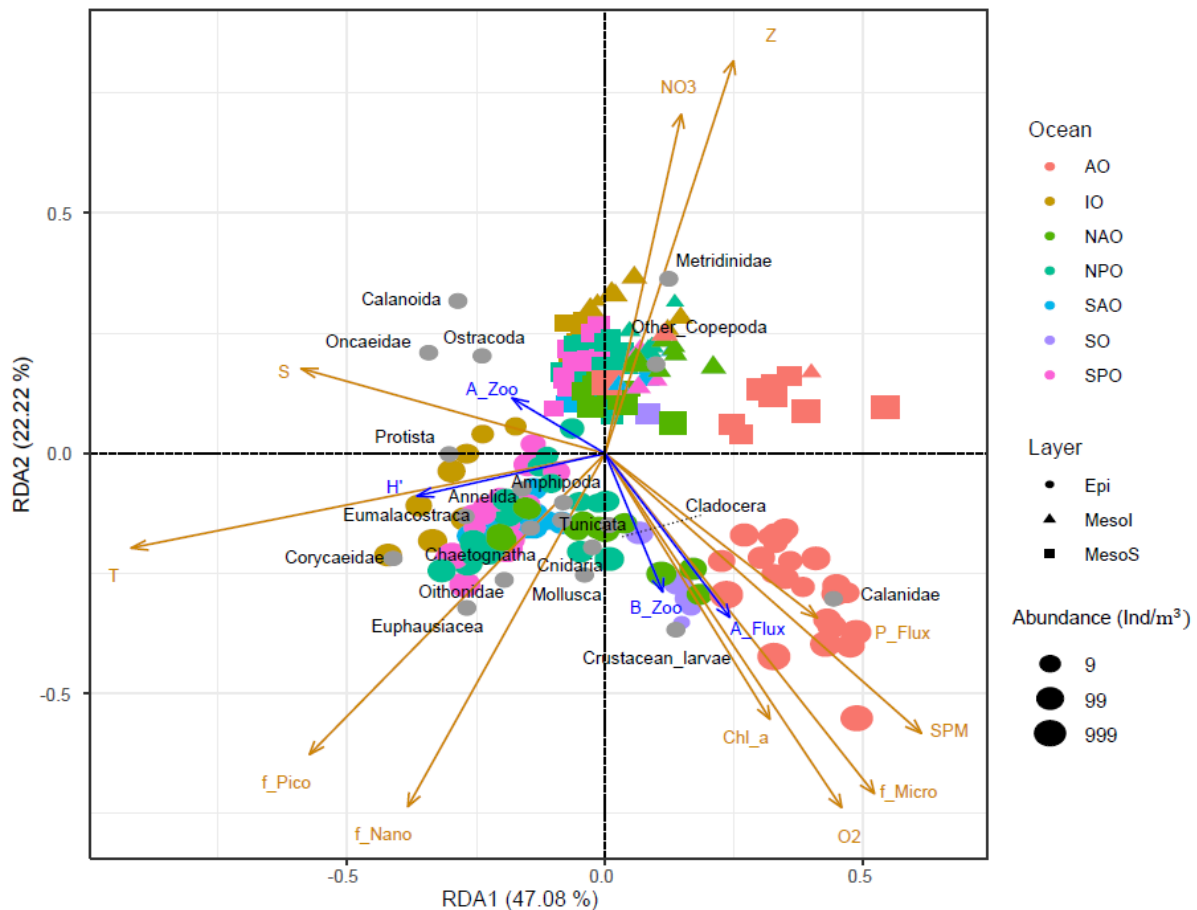

1180

1181 Figure S2: RDA performed with all layers. Each colored dot corresponds to a sample, i.e., one net at one  
 1182 depth at one station. The orange arrows mark the projection of the environmental variables in RDA space:  
 1183  $f_{pico}$ ,  $f_{nano}$  and  $f_{micro}$  correspond to the relative contribution (%) of pico-, nano- and micro-phytoplankton  
 1184 to total phytoplankton biomass, median value of ( $O_2$  = dissolved oxygen concentration ( $\mu\text{mol/kg}$ ),  $Chl_a$  =  
 1185 Chlorophyll a concentration ( $\text{mg/m}^3$ ),  $SPM$  = suspended particles matter ( $\text{m/sr}$ ),  $T$  = temperature ( $^\circ\text{C}$ ),  $Sal$  =  
 1186 salinity,  $NO_3$  = nitrate concentration ( $\text{mol/L}$ ),  $Z$  = depth (m) ) and  $P\_Flux$  = particulate flux ( $\text{mg}\cdot\text{m}^{-2}\cdot\text{d}^{-1}$ ).  
 1187 Grey dots mark the projection of the zooplankton groups abundance ( $\text{ind}\cdot\text{m}^{-3}$ ). Colors correspond to the ocean  
 1188 basin where the samples were taken: AO = Arctic Ocean, IO = Indian Ocean, NAO = North Atlantic Ocean,  
 1189 NPO = North Pacific Ocean, SAO = South Atlantic Ocean, SO = Southern Ocean, SPO = South Pacific Ocean.  
 1190 Shapes illustrate the vertical layers where the samples were taken: Epi = epipelagic, MesoS = upper mesopelagic  
 1191 and MesoI = lower mesopelagic.

1192

1193

1194

1195 Table S1: List of nets that were removed from the RDA analysis. AO=Arctic Ocean, IO=Indian Ocean,  
 1196 NAO=North Atlantic Ocean, NPO=North Pacific Ocean, SAO=South Atlantic Ocean, SO=Southern  
 1197 Ocean or Austral Ocean, SPO=South Pacific Ocean.

| Ocean Bassin | Nets                                                                                                     |
|--------------|----------------------------------------------------------------------------------------------------------|
| IO           | 36_4,38_4, 39_2, 42_3                                                                                    |
| AO           | 163_2, 163_3, 206_2                                                                                      |
| NAO          | 142_4,142_4n,143_3,143_3n,147_3,147_4,150_1,150_4,151_2,151_4,152_2,152_3,155_2,158_2                    |
| NPO          | 131_2, 132_2,133_3,135_2,137_3,137_3n                                                                    |
| SAO          | 131_2, 132_2,133_3,135_2,137_3,137_3n                                                                    |
| SO           | 84_1, 85_1, 85_2                                                                                         |
| SPO          | 98_2, 98_3, 102_1, 106_2,<br>106_4,109_1,110_1,110_1n,111_1,111_1n,122_1,122_1n,125_1,125_3,127_2,127_2n |

1198

1199

1200

1201 Table S2: Wilcoxon test for day and night for each taxon at level of 5% (bold values mean significant  
 1202 test)

| Species           | Wilcoxon p-value (abundance) |                   | Wilcoxon p-value (biomass) |                   |
|-------------------|------------------------------|-------------------|----------------------------|-------------------|
|                   | Epipelagic                   | Upper Mesopelagic | Epipelagic                 | Upper Mesopelagic |
| Protista          | 0.50                         | 0.13              | 0.8                        | 0.06              |
| Annelida          | 0.66                         | 0.82              | 0.62                       | 0.57              |
| Chaetognatha      | 1                            | 0.20              | 0.58                       | 0.32              |
| Tunicata          | 0.26                         | 0.078             | 0.06                       | 0.19              |
| Cnidaria          | 0.90                         | <b>0.037</b>      | 0.58                       | <b>0.009</b>      |
| Mollusca          | 0.95                         | 0.123             | 0.26                       | 0.96              |
| Eumalacostraca    | 0.39                         | 0.62              | <b>0.049</b>               | 0.49              |
| Euphausiacea      | 0.21                         | <b>0.0098</b>     | <b>0.0001</b>              | 0.63              |
| Amphipoda         | <b>0.07</b>                  | 0.91              | 0.39                       | 0.83              |
| Ostracoda         | 0.32                         | 0.96              | <b>0.049</b>               | 1                 |
| Crustacean_larvae | <b>0.01</b>                  | 0.81              | 0.23                       | 0.81              |
| Other_Copepoda    | 0.76                         | 0.46              | 0.95                       | 0.41              |
| Calanoida         | 0.10                         | 0.24              | 0.11                       | 0.32              |
| Oithonidae        | 0.19                         | 1                 | 0.24                       | 0.84              |
| Corycaeiidae      | <b>0.01</b>                  | 1                 | <b>0.016</b>               | 0.76              |
| Oncaeiidae        | 0.66                         | 0.41              | 0.8                        | 0.51              |
| Metridinidae      | <b>0.0001</b>                | <b>0.018</b>      | <b>0.0001</b>              | <b>0.006</b>      |
| Calanidae         | 0.29                         | 0.12              | 0.07                       | 1                 |

1203

1204

1205

1206

1207

1208
